1 **Structural insight into tanapoxvirus mediated inhibition of apoptosis**

2

3 Chathura D. Suraweera<sup>1</sup>, Mohd Ishtiaq Anasir<sup>1§</sup>, Srishti Chugh<sup>1&</sup>, Airah Javorsky<sup>1</sup>, Rachael

4 E. Impey<sup>1</sup>, Mohammad Hasan Zadeh<sup>1</sup>, Tatiana P. Soares da Costa<sup>1</sup>, Mark G. Hinds<sup>2\*</sup> and

5 Marc Kvensakul<sup>1\*</sup>

6

7 <sup>1</sup>La Trobe Institute for Molecular Science, Department of Biochemistry and Genetics, La  
8 Trobe University, VIC 3086, Australia

9 <sup>2</sup>Bio21 Molecular Science and Biotechnology Institute, The University of Melbourne,  
10 Parkville, Australia

11 <sup>&</sup>Current address: CSL Limited, Parkville, Victoria, Australia

12 <sup>§</sup>Current address: Centre for Virus and Vaccine Research, Sunway University, Malaysia

13

14

15

16 **Running title:** Tanapoxvirus 16L inhibits apoptosis

17

18 **Keywords:** Poxvirus, tanapoxvirus, apoptosis, X-ray crystallography, isothermal titration

19 calorimetry, Bcl-2

20

21

22 **ABSTRACT**

23 Premature programmed cell death or apoptosis of cells is a strategy utilized by multicellular  
24 organisms to counter microbial threats. Tanapoxvirus (TPV) is a large double-stranded DNA  
25 virus belonging to the *poxviridae* that causes mild Monkeypox-like infections in humans and  
26 primates. TPV encodes for a putative apoptosis inhibitory protein 16L. We now show that  
27 TPV16L is able to bind to a range of peptides spanning the BH3 motif of human pro-  
28 apoptotic Bcl-2 proteins, and is able to counter growth arrest of yeast induced by human Bak  
29 and Bax. We then determined the crystal structures of TPV16L bound to three identified  
30 interactors, Bax, Bim and Puma BH3. TPV16L adopts a globular Bcl-2 fold comprising 7  $\alpha$ -  
31 helices, and utilizes the canonical Bcl-2 binding groove to engage pro-apoptotic host cell Bcl-  
32 2 proteins. Unexpectedly, TPV16L is able to adopt both a monomeric as well as a domain-  
33 swapped dimeric topology where the  $\alpha$ 1 helix from one protomer is swapped into a  
34 neighbouring unit. Despite adopting two different oligomeric forms, the canonical ligand  
35 binding groove in TPV16L remains unchanged from monomer to domain-swapped dimer.  
36 Our results provide a structural and mechanistic basis for tanapoxvirus mediated inhibition of  
37 host cell apoptosis, and reveal the capacity of Bcl-2 proteins to adopt differential oligomeric  
38 states whilst maintaining the canonical ligand binding groove in an unchanged state.

39

40

## 41 **Introduction**

42 Tanapoxvirus [1] is a member of the *yatapoxviridae*, a large double-stranded DNA virus  
43 from the *poxviridae* superfamily. The *yatapoxviridae* comprise Tanapox virus (TPV), Yaba-  
44 like disease virus (YLDV) and Yaba monkey tumor virus (YMTV), and causes mild  
45 monkeypox-like infections in humans as well as primates with symptoms that include fever  
46 and skin lesions [2]. Tanapoxvirus encodes a range of immune modulatory proteins such as  
47 TNF inhibitors [3], as well as a putative B-cell lymphoma-2 (Bcl-2) homolog [4]. Bcl-2  
48 proteins constitute a large family of proteins that primarily control programmed cell death, or  
49 apoptosis, in higher organisms [5] and are evolutionarily ancient [6]. The family comprises  
50 both prosurvival and proapoptotic members, which are characterized by the presence of one  
51 or more of four Bcl-2 homology or BH motifs and a transmembrane anchor region [7]. The  
52 mammalian prosurvival Bcl-2 members comprise Bcl-2, Bcl-w, Bcl-x<sub>L</sub>, Mcl-1, A1 and Bcl-b,  
53 and maintain host cell survival. In contrast, proapoptotic Bcl-2 family members are  
54 subdivided into two separate groups, the multimotif executors that comprise Bak, Bax and  
55 Bok, and a second group, the BH3-only proteins, which only feature a BH3 motif and  
56 includes Bad, Bid, Bik, Bim, Bmf, Hrk, Noxa, and Puma [8]. The BH3-only proteins  
57 modulate apoptosis by neutralizing the activity of prosurvival Bcl-2 through binding a  
58 surface groove [9]. After activation, Bak and Bax oligomerize to perforate the outer  
59 mitochondrial membrane leading to inner membrane herniation [10] and subsequent release  
60 of cytochrome *c*, that triggers the formation of the apoptosome and activation of downstream  
61 caspases that dismantle the cell [11].

62 A number of large DNA viruses encode functional, sequence and structural homologs  
63 of Bcl-2 that promote infected host cell survival and viral proliferation [12]. Viral Bcl-2  
64 homologs have been identified in *herpesviridae*, include those from Epstein Barr virus  
65 BHRF1 [13, 14] and Kaposi sarcoma virus KsBcl-2 [15-17]. Other major virus families that

66 contain members encoding for pro-survival Bcl-2 proteins include the *asfarviridae* with  
67 African swine fever virus encoded A179L [18-20], and grouper iridovirus encoded GIV66  
68 [21, 22] from the *iridoviridae*. However, the largest number of Bcl-2 homologs are found in  
69 *poxviridae* [12] such as vaccinia and variola virus F1L [23-25] and myxomavirus M11L [26-  
70 28]. Whilst structural studies have shown [18, 21, 24, 29-31] these virus encoded Bcl-2-fold  
71 proteins there is substantial diversity with regards to which proapoptotic host Bcl-2 proteins  
72 they bind. For example, vaccinia virus F1L binds Bim, Bak and Bax only [32], whereas  
73 sheeppoxvirus SPPV14 binds Bid, Bim, Bmf, Hrk, Puma, Bak and Bax [33], and African  
74 swine fever virus A179L binds all major pro-apoptotic Bcl-2 proteins [18]. The diversity  
75 observed amongst the proapoptotic ligand binding profiles for virus encoded prosurvival Bcl-  
76 2 extends to the mechanisms of action too, for example, myxomavirus M11L primarily acts  
77 by sequestering Bak and Bax [28], whereas vaccinia virus F1L neutralizes host cell death by  
78 sequestering Bim during viral infections [23].

79 Tanapoxvirus encoded TPV16L is a putative homolog of deerpoxvirus DPV022 [4]  
80 (Figure 1). In order to understand the putative apoptosis regulatory function of TPV16L we  
81 examined its ability to bind to peptides of host proapoptotic Bcl-2 proteins, and determined  
82 crystal structures of TPV16L bound to its interactors. We now show that TPV16L is a highly  
83 flexible Bcl-2 fold protein that is able to bind to BH3 motif peptides of host proapoptotic Bcl-  
84 2 proteins with high affinity both as a monomeric and domain-swapped dimeric form. These  
85 findings provide a mechanistic basis for tanapox mediated inhibition of apoptosis, and  
86 highlight the substantial structural flexibility in the Bcl-2 fold that allows multiple oligomeric  
87 topologies to engage proapoptotic interactors using the canonical ligand binding groove.

88

## 89 **Materials and methods**

### 90 **Protein expression and purification**

91 Synthetic cDNA encoding for codon optimized wildtype TPV16L (Uniprot Accession  
92 number Q9DHU6) as well as three mutants TPV16L (K52A, R90A and A96I) lacking 23 C-  
93 terminal residues were cloned into the bacterial expression vector pGex-6p-1 (Genscript).  
94 Recombinant TPV16L was expressed in C41(DE3) cells in 2YT medium supplemented with  
95 1 mg/ml ampicillin at 37°C in a shaking incubator until an OD<sub>600</sub> of 0.6 was reached. The  
96 protein expression was induced by adding isopropyl β-D-1-thiogalactopyranoside (IPTG) to  
97 final concentration of 0.75 mM for 18 hours at 20°C. Bacterial cells were harvested by  
98 centrifugation at 5000 rpm (JLA 9.1000 rotor, Beckman Coulter Avanti J-E) for 20 min and  
99 re-suspended in 100 ml lysis buffer A (50 mM Tris pH 8.0, 300 mM NaCl and 10 mM DTT  
100 (dithiothreitol). The cells were homogenized using an Avestin EmulsiFlex homogenizer and  
101 lysed using sonication (programme 7, Fisher Scientific™ Model 705 Sonic Dismembrator)  
102 and the resultant lysate was transferred into SS34 tubes for further centrifugation at 18,000  
103 rpm (JA-25.50 rotor, Beckman Coulter Avanti J-E) for 30 min. The supernatant was loaded  
104 onto 5 mL of glutathione sepharose 4B (GE Healthcare) equilibrated with buffer A. After  
105 sample application, the column was washed with 150 ml of buffer A and protein on-column  
106 cleavage was achieved by adding HRV 3C protease overnight at 4°C. The cleaved protein  
107 was eluted using buffer A, with the remaining protein being concentrated using a centrifugal  
108 concentrator with 3 kDa molecular weight cut-off (Amicon® Ultra 15) to a final volume of 2  
109 ml. Concentrated TPV16L was subjected to size-exclusion chromatography using a Superdex  
110 S200 increase 10/300 column mounted on an ÄKTA Pure system (GE Healthcare)  
111 equilibrated in 25 mM HEPES pH 7.5, 150 mM NaCl and 5 mM TCEP (Tris(2-  
112 carboxyethyl)phosphine hydrochloride), and fractions analysed using SDS-PAGE. The final  
113 sample purity was estimated to be higher than 95% based on SDS-PAGE analysis.  
114 Appropriate fractions were pooled and concentrated using a centrifugal concentrator with 3  
115 kDa molecular weight cut-off (Amicon ® Ultra 15) to final concentration of 5.4 mg/ml.

116

### 117 **Analytical ultracentrifugation**

118 Sedimentation velocity experiments were performed in a Beckman Coulter XL-A analytical  
119 ultracentrifuge as described previously [34-37]. Briefly, double sector quartz cells were  
120 loaded with 400  $\mu$ l of buffer (25 mM HEPES pH 7.5, 150 mM NaCl, 5mM TCEP) and  
121 380  $\mu$ l of sample (solubilized in buffer). For the runs with apo protein, initial concentrations  
122 of 0.2 mg/ml, 0.4 mg/ml and 0.8 mg/ml were employed. For the runs with the complexes, the  
123 protein and peptide concentrations were kept at 0.2 mg/ml. The cells were loaded into an  
124 An50-Ti rotor and the experiments conducted at 25°C. Initial scans were carried out at  
125 3,000 rpm to determine the optimal wavelength and radial positions. Final scans were  
126 performed at 40,000 rpm and data were collected continuously at 230 nm using a step size  
127 of 0.003 cm without averaging. Solvent density, solvent viscosity and estimates of the  
128 partial specific volume of apo TPV16L, TPV16L:Bim, TPV16L:Puma and TPV16L:Bax. at  
129 25°C were calculated using SEDNTERP [38]. Data were fitted using the SEDFIT software  
130 ([www.analyticalultracentrifugation.com](http://www.analyticalultracentrifugation.com)) to a continuous size-distribution model [39-41].

131

### 132 **Measurement of dissociation constants**

133 Binding affinities were measured using a MicroCal iTC200 system (GE Healthcare) at 25°C  
134 using wild type TPV16L as well as three mutants TPV16L K52A, R901 and A96I in 25 mM  
135 HEPES pH 7.5, 150 mM NaCl, 5 mM TCEP at a final concentration of 30  $\mu$ M. BH3 motif  
136 peptide ligands were used at a concentration of 300  $\mu$ M and titrated using 19 injections of 2.0  
137  $\mu$ l of ligand. All affinity measurements were performed in triplicate. Protein concentrations  
138 were measured using a Nanodrop UV spectrophotometer (Thermo Scientific) at a wavelength  
139 of 280 nm. Peptide concentrations were calculated based on the dry peptide weight after  
140 synthesis. The BH3-motif peptides used were commercially synthesized and were purified to

141 a final purity of 95% (GenScript) and based on the human sequences. Bim:  
142 DMRPEIWIAQELRRIGDEFNAYYARR (UniProt accession code O43521, residues 141-  
143 166), Puma: EEQWAREIGAQLRRMADDLNAQYERR (accession code Q9BXH1, residues  
144 130-155), Bik: MEGSDALALRLACIGDEMVDVSLRAP (accession code Q13323, residues  
145 51-75), Bax: VPQDASTKKLSECLKRIGDELDSNMELQ (accession code Q07812, residues  
146 50-77), Bak PSSTMGQVGRQLAIIGDDINRRYDSE (accession code Q16611, residues 67-  
147 92), Bid: QEDIIRNIARHLAQVGDSMDRSIPPG (accession code P55957, residues 79-104),  
148 Bad: NLWAAQRYGRELRRMSDEFVDSFKKG (accession code Q92934 ,residues 103-  
149 128), Bmf: GQWQHQAQEVQIARKLQCIADQFHRLHVQQ (accession code Q96LC9,  
150 residues 123-151), Noxa: PAELEVECATQLRRFGDKLNFRQKLL (accession code  
151 Q13794, residues 18-43 ), Bok: VPGRLAEVCAVLLRLGDELEMIRPSV (accession code  
152 Q9UMX3, residues 59-84), Hrk: RSSAAQLTAARLKAIGDELHQRTMWR (accession code  
153 O00198, residues 26-51).

154

#### 155 **Crystallization and structure determination**

156 Crystals for TPV16L: Bax BH3, TPV16L: Puma BH3 or TPV16L: Bim BH3 complexes  
157 were obtained by mixing TPV16L with human Bax BH3 28-mer or Puma BH3 26-mer  
158 peptide into 1:1.25 molar ratio as described previously [42] and concentrated using a  
159 centrifugal concentrator with 3 kDa molecular weight cut-off (Amicon ® Ultra 0.5) to 5  
160 mg/ml and concentrated protein was immediately used for crystallization trials. Initial high  
161 throughput sparse matrix screening was performed using 96 well sitting drop trays (swissic,  
162 Neuheim, Switzerland).

163 TPV16L: Bax BH3 crystals were grown by the sitting drop vapour diffusion method  
164 at 20°C in 1.0 M LiCl, 0.1 M Citrate pH 4.0, 20 % W/V PEG 6000. The crystals were flash  
165 cooled at -173°C in mother liquor supplemented with 20% ethylene glycol. The TPV16L:

166 Bax BH3 complex formed single square bipyramidal crystals belong to space group  $P4_32_12$   
167 with  $a = 55.36 \text{ \AA}$ ,  $b = 55.36 \text{ \AA}$ ,  $c = 126.96 \text{ \AA}$ ,  $\alpha = 90.00^\circ$ ,  $\beta = 90.00^\circ$ ,  $\gamma = 90.00^\circ$  in the  
168 tetragonal crystal system.

169 Diffraction data were collected at the Australian Synchrotron MX2 beamline using an  
170 Eiger detector with an oscillation range  $0.1^\circ$  per frame with a wavelength of  $0.9537 \text{ \AA}$ ,  
171 integrated using XDS [43] and scaled using AIMLESS [44]. Molecular replacement was  
172 carried out using PHASER [45] with the previously solved structure of DPV022 (PDB ID:  
173 4UF1 [29]) as a search model. TPV16L: Bax BH3 crystals contained one molecule of  
174 TPV16L and one Bax BH3 peptide in the asymmetric unit, with 46.3% solvent content and  
175 final TFZ and LLG values of 8.0 and 52.79 respectively. The final model of TPV16L: Bax  
176 BH3 was built manually over several cycles using Coot [46] and refined using PHENIX [47]  
177 with final  $R_{\text{work}}/R_{\text{free}}$  of 0.23/0.25, with 99.1% of residues in the favoured region of the  
178 Ramachandran plot and no outliers.

179 TPV16L: Puma BH3 crystals were grown as the TPV16L: Bax BH3 crystals and were  
180 obtained in 0.1 M Potassium thiocyanate, 30% PEG 2000MME. The crystals were flash  
181 cooled at  $-173^\circ\text{C}$  in mother liquor. The TPV16L: Bax BH3 complex formed single rod-  
182 shaped crystals belong to space group  $P2_12_12_1$  with  $a = 54.09 \text{ \AA}$ ,  $b = 54.87 \text{ \AA}$ ,  $c = 60.22 \text{ \AA}$ ,  $\alpha$   
183  $= 90.00^\circ$ ,  $\beta = 90.00^\circ$ ,  $\gamma = 90.00^\circ$  in monoclinic crystal system. Diffraction data collection,  
184 integration and scaling were performed as described above. The molecular replacement was  
185 carried out using PHASER with the previously solved structure of TPV16L: Bax BH3 as a  
186 search model. TPV16L: Puma BH3 crystals contain one molecule of TPV16L and one Puma  
187 BH3 peptide, with 46.3% solvent content and final TFZ and LLG values of 13.2 and 133.15  
188 respectively. The final model of TPV16L: Puma BH3 was built manually over several cycles  
189 using Coot and refined using PHENIX with final  $R_{\text{work}}/R_{\text{free}}$  of 0.19/0.22 with 99.3% of  
190 residues in the Ramachandran favoured region of the plot and no outliers.



191 TPV16L: Bim BH3 crystals were grown similar to other two complexes as above and  
192 in 0.1 M MIB buffer pH 8.0, 25% PEG 1500. The crystals were flash cooled at -173°C in  
193 mother liquor. The TPV16L: Bim BH3 complex formed single small cubic shape crystals  
194 belong to space group  $P3_22_1$  with  $a = 59.65 \text{ \AA}$ ,  $b = 59.65 \text{ \AA}$ ,  $c = 90.90 \text{ \AA}$ ,  $\alpha = 90.00 \text{ \AA}$ ,  $\beta =$   
195  $90.00 \text{ \AA}$ ,  $\gamma=120.00 \text{ \AA}$  in hexagonal crystal system. Diffraction data collection, integration and  
196 scaling were performed as described above. Molecular replacement was carried out using  
197 PHASER with the previously solved structure of TPV16L: Bax BH3 as a search model.  
198 TPV16L: Bim BH3 crystals contain one molecule of TPV16L and one Bim BH3 peptide,  
199 with 44.01% solvent content and final TFZ and LLG values of 15.8 and 208.64 respectively.  
200 The final model of TPV16L: Bim BH3 was built manually and refined as described above to  
201 yield a final  $R_{\text{work}}/R_{\text{free}}$  of 0.24/0.27 with 98% of residues in Ramachandran favoured region  
202 of the plot and no outliers. Coordinate files have been deposited in the Protein Data Bank  
203 under the accession codes 6TPQ, 6TQQ and 6TRR. All images were generated using the  
204 PyMOL Molecular Graphics System, Version 1.8 Schrödinger, LLC. All software was  
205 accessed using the SBGrid suite [48]. All raw diffraction images were deposited on the  
206 SBGrid Data Bank [49] using their PDB accession code 6TPQ, 6TQQ and 6TRR.

207

## 208 **Sequence alignment**

209 Sequence alignments were performed using MUSCLE [50]  
210 (<https://www.ebi.ac.uk/Tools/msa/muscle/>) with the default settings, and sequence identities  
211 were calculated based on the total number of conserved residues in TPV16L against the full  
212 sequence.

213

## 214 **Yeast colony assays**

215 *Saccharomyces cerevisiae* W303 $\alpha$  cells were co-transformed with pGALL(TRP) vector only,  
216 pGALL(TRP)-Bcl-x<sub>L</sub>, or pGALL(TRP)-TPV16L and pGALL(Leu)-Bak or pGALL(Leu)-  
217 Bax. pGALL(TRP) and pGALL(Leu) places genes under the control of a galactose inducible  
218 promoter [51]. Cells were subsequently spotted as a 5-fold serial dilution series onto medium  
219 supplemented with 2% w/v galactose (inducing, “ON”) to induces protein expression, or 2%  
220 w/v glucose (repressing, “OFF”), which prevents protein expression, as previously described  
221 [52]. Plates were incubated for 48 h at 30°C and then photographed.

222

## 223 **Results**

224 In order to reveal the function for TPV16L, we recombinantly expressed and purified  
225 TPV16L lacking the C-terminal 23 residues and examined its ability to bind to peptides  
226 spanning the BH3 motif of all proapoptotic human Bcl-2 proteins using isothermal titration  
227 calorimetry (ITC). TPV16L bound to a number of BH3 motif peptides with high affinity,  
228 including those from the BH3-only proteins Bim, Bid, Hrk and Puma as well as those from  
229 the multimotif executor proteins Bak and Bax (Figure 2, Table 1). We then utilized a yeast  
230 based heterologous expression system for studying functional interactions of TPV16L with  
231 Bak and Bax [13]. Consistent with our ITC data, we observed that TPV16L could directly  
232 counter Bak and Bax induced yeast growth arrest when these proteins were overexpressed in  
233 yeast (Figure 3).

234 To understand the structural basis for proapoptotic Bcl-2 binding by TPV16L we then  
235 determined the crystal structure of TPV16L bound to the human Bax, Bim and Puma BH3  
236 motifs (Figure 4, Table 2). In the TPV16L:Bax BH3 complex, TPV16L adopts a globular  
237 Bcl-2 fold comprising 7  $\alpha$ -helices (Figure 4a). Similar to vaccinia and variola virus F1L and  
238 deerpoxvirus DPV022 TPV16L adopts a domain-swapped dimeric topology where the  $\alpha$ 1  
239 helix from one protomer is swapped with that of a second protomer in the complex, taking up

240 the space vacated by the matching  $\alpha 1$  helix (Figures 4a, c). Superimposition of one chain of  
241 the TPV16L from the domain-swapped dimer TPV16L:Bax BH3 complex with the  
242 equivalent chain from the domain-swapped dimer VACV F1L from F1L:Bak BH3 [23] and  
243 the domain-swapped dimer DPV022 from DPV022:Bax BH3 [29] (Figures 4c, S2) yields an  
244 rmsd of 2.3 Å (superimposed over 122 C $\alpha$  atoms) and 2.1 Å (superimposed over 131 C $\alpha$   
245 atoms), respectively, whereas superimposition of the entire domain-swapped dimer of  
246 TPV16L yields rmsd values of 2.2 and 2.7 Å, respectively. The position of the TPV16L  $\alpha 1$   
247 within the domain-swapped dimer is identical to VACV F1L and DPV022 (Figure S2).  
248 Similarly, TPV16L in the TPV16L:Bim BH3 complex adopts a domain swapped dimeric  
249 configuration that is identical to the TPV16L:Bax BH3 complex (Figure 4b).

250 Unexpectedly, TPV16L in the TPV16L: Puma BH3 complex adopts a monomeric  
251 Bcl-2 fold, where the  $\alpha 1$  helix is folded back into the side of the globular Bcl-2 fold (Figure  
252 4d). A DALI analysis [53] indicated that the closest homolog in the PDB is myxomavirus  
253 M11L (Figure 4e, PDB ID 2JBX [28]) with an rmsd of 2.1 Å (over 111 C $\alpha$ ), whereas the  
254 closest mammalian Bcl-2 structure is human Mcl-1 (PDB ID 5FC4 [54]) with an rmsd of 2.3  
255 Å (over 126 C $\alpha$ ) (Figure S2c).

256 TPV16L utilized the canonical Bcl-2 ligand binding groove formed by  $\alpha 2-5$  to engage  
257 BH3 motif ligands (Figure 5, S1). In the TPV16L:Bax BH3 complex (Figure 5a), Bax  
258 residues L157, L161, I164 and L168 protrude into the four hydrophobic pockets of TPV16L.  
259 In addition, ionic interactions are observed between TPV16L R90 guanidium group and Bax  
260 D166 carboxyl as well as TPV16L R90 guanidium group and Bax D169 carboxyl group, with  
261 a further three hydrogen bonds between the TPV16L S84 hydroxyl group and the Bax S158  
262 hydroxyl group, TPV16L R90 guanidium group and Bax K162 amine as well as TPV16L  
263 S92 hydroxyl group and the main chain amide group of Bax G165 (Figure 5a).

264 In the TPV16L:Bim BH3 complex (Figure 5b), Bim residues I157, L161, I164 and  
265 F168 are used to engage the four hydrophobic pockets in TPV16L. Furthermore, there is one  
266 ionic interaction between TPV16L R90 guanidium group and Bim D166 carboxyl group and  
267 a hydrogen bond between TPV16L N87 amide and Bim R162 guanidium group. In the  
268 TPV16L: Puma BH3 complex (Figure 5c), Puma utilizes the four hydrophobic residues I136,  
269 L140, M143 and L147 to engage the four hydrophobic pockets in TPV16L. These  
270 hydrophobic interactions are supplemented by ionic interactions between TPV16L R90  
271 guanidium group and Puma D145 carboxyl group as well as TPV16L K52 ammonium group  
272 and Puma D146 carboxyl group. Furthermore, two hydrogen bonds are found between  
273 TPV16L Y53 hydroxyl and Puma D146 carboxyl group, and between the TPV16L N56  
274 sidechain amide and Puma Q139 sidechain carbonyl groups. Superimposition of monomeric  
275 TPV16L from the complex with Puma BH3 with one of the chains from the domain-swapped  
276 dimeric form of TPV16L from the Bax BH3 complex yields an rmsd of 1.2 Å over  $\alpha$ 2-7 (117  
277 C $\alpha$  atoms), indicating that despite the topology change from monomer to domain-swapped  
278 dimer the regions of TPV16L not involved in the domain swap remain near identical.

279 Since we observed TPV16L in both a monomeric and domain-swapped dimeric  
280 topology, we subjected TPV16L and some of its complexes with BH3 motif peptides to  
281 analytical ultracentrifugation (AUC). AUC was performed on TPV16L alone as well as on  
282 TPV16L bound to Bim, Bax and Puma BH3 (Figure 6). TPV16L alone revealed a mixture of  
283 monomeric and dimeric protein at concentrations ranging from 0.2-0.8 mg/mL, with a ratio  
284 of monomer:dimer of ~3.5:1. Similarly, complexes of TPV16L with Bim, Bax and Puma  
285 BH3 at 0.2 mg/mL also revealed a mixture of heterodimers and heterotetramers, with the  
286 ratio of TPV16L:Bim BH3 heterodimers vs heterotetramers being ~4:1, with TPV16L: Bax  
287 and Puma complexes displaying comparable ratios of ~3.5:1, respectively, closely matching  
288 the ratio observed for TPV16L alone (Figure 6).

289 To validate the crystal structures of TPV16L bound to Bim, Bax and Puma BH3 we  
290 performed structure-guided mutagenesis (Figure 5d) and analysed the mutants for their ability  
291 to bind to proapoptotic BH3 motif peptides (Table 1). Mutation of the conserved R90 in  
292 TPV16L substantially impacts on its ability to bind BH3 motif peptides, with 10-80 fold  
293 reduction in affinities for Bim, Bad, Bid, Bik as well as Bak and Bax BH3 binding, whereas  
294 binding to Hrk and Puma BH3 is only reduced ~2-fold. Similarly, an A96I substitution led to  
295 affinity losses of 2-40 fold across all interactors. In contrast, whilst mutation of K52 to Ala  
296 also led to a 2-4 fold reduction in binding affinities for many interactors, binding to Bid BH3  
297 was largely unaffected. In contrast, binding to Bad and Bmf BH3 was reduced by 40 and 20  
298 fold, respectively.

299

## 300 **Discussion**

301 Altruistic death of an infected cell is a potent mechanism to restrict viral infections. Viruses  
302 have evolved numerous strategies to prevent premature host cell death to establish productive  
303 infections [12]. Tanapoxvirus encodes TPV16L, a putative Bcl-2 homolog, and we now show  
304 that TPV16L adopts both a classical monomeric form as well as a domain-swapped dimer.  
305 Dimeric TPV16L is able to bind both BH3-only proteins as well as the BH3 regions of Bak  
306 and Bax. TPV16L harbours a broad proapoptotic BH3 ligand binding profile when compared  
307 to other poxvirus encoded domain-swapped pro-survival Bcl-2 proteins. The poxvirus  
308 encoded pro-survival Bcl-2 homologs VACV F1L [32], VARV F1L [24] and deerpoxvirus  
309 DPV022 [29] all have similar dimeric topologies to TPV16L dimer but feature more  
310 restricted interaction and affinity profiles. VACV F1L [32] and DPV022 [29] only bind to  
311 Bim, Bak and Bak whereas VARV F1L binds Bid, Bak and Bax [24]. In all three cases these  
312 interactions are characterized by lower affinities, in particular for Bak and Bax which bind  
313 with only micromolar affinities to VACV F1L, DPV022 F1L and DPV022. In contrast,

314 TPV16L displays much tighter affinities including 38 nM for Bak and 70 nM for Bax (Table  
315 1). Intriguingly, TPV16L is able to adopt both monomeric and domain-swapped dimer  
316 topologies, however the domain swap does not impact significantly on the configuration of  
317 the canonical ligand binding groove. Superimposition of monomeric and dimeric TPV16L  
318 reveals there are virtually no differences in the respective ligand binding grooves. However,  
319 no thermodynamic analysis has been performed to examine such effects on ligand binding.

320 A comparison of the overall dimeric structures of TPV16L with other domain  
321 swapped poxviral Bcl-2 dimers reveals that dimeric TPV16L superimposes on a VACV F1L  
322 dimer with an rmsd of 2.2 Å (over 266 Cα atoms) and on dimeric DPV022 with 2.7 Å (over  
323 274 Cα atoms). This high level of similarity is achieved despite low overall sequence identity  
324 (8% between TPV16L and VACV F1L and 31% between TPV16L and DPV022). A detailed  
325 comparison of the interactions formed by TPV16L and DPV022 when bound to Bax reveals  
326 that the hallmark interaction between the conserved Asp from Bax BH3 with an Arg from  
327 TPV16L or DPV022 BH1 is preserved, as are hydrogen bonds between Bax Ser158 and  
328 Asp169 with TPV16L S84 or DPV022 E80. As expected, loss of the hallmark ionic  
329 interaction severely impacts TPV16L ability to bind to pro-apoptotic Bcl-2 interactors, with a  
330 TPV16L R90A mutation displaying up to 80 fold reduction in affinity (Table 1), as  
331 previously observed for mammalian prosurvival Bcl-2 [55]. Unlike in the DPV022 complex  
332 with Bax [29], the bulk of the BH3 peptides are engaged in the TPV16L ligand binding  
333 groove resulting in buried surface areas of 2343-3142 Å<sup>2</sup> for the complexes with Bax, Bim  
334 and Puma, whereas in DPV022:Bax BH3 only 4 helical turns are engaged that bury 2117 Å<sup>2</sup>,  
335 which may contribute to the more modest affinity of the interaction. The more extensive  
336 engagement of the TPV16L binding groove with a BH3 peptide thus provides a possible  
337 rationale for the substantially tighter binding observed compared with DPV022.

338 Virus encoded Bcl-2 proteins are not limited to domain-swapping for dimer formation  
339 (Figure S3). Vaccinia virus has been shown to encode for a suite of Bcl-2 fold proteins that  
340 modulate NF- $\kappa$ B signalling, which all adopt dimeric topologies utilizing an interface formed  
341 by helices  $\alpha$ 1 and 6 [56-59]. In contrast, grouper iridovirus encoded GIV66 forms dimers that  
342 occlude the canonical ligand binding groove, with binding of BH3 motif peptides dissociating  
343 the dimers [21]. Domain-swapping is not limited to virus-encoded Bcl-2 proteins, and is also  
344 observed in mammalian Bcl-2. Bcl-x<sub>L</sub> has been shown to adopt domain-swapped topologies  
345 featuring either  $\alpha$ 5-8 or  $\alpha$ 1 swaps. However, these swaps were induced by exposure to  
346 extreme pH [60] or temperature environments [61] or by truncation of the loop connecting  $\alpha$ 1  
347 and  $\alpha$ 2 [62], respectively. In contrast, recombinantly expressed Bcl-w lacking its C-terminal  
348 tail adopts both a monomeric state as well as a domain swapped dimeric state where  $\alpha$ 3-4 are  
349 swapped [63, 64]. Such a swap impacts the canonical ligand binding groove, and leads to  
350 differential binding affinities between monomeric and dimeric Bcl-w [64]. Domain swapping  
351 has also been shown for human proapoptotic Bak [65] and Bax [66], where the formation of  
352 an extended single helix comprising helices  $\alpha$ 5 and 6 leads to a core/latch configuration,  
353 where a core domain formed by  $\alpha$ 1-4 partners the latch domain formed by  $\alpha$ 6-8 from a  
354 second protomer. In contrast, catfish Bax features a domain swapped  $\alpha$ 9 helix [67]. This  
355 significant number of topological variances across dimeric Bcl-2 proteins underscores the  
356 inherent flexibility in this fold, and potentially enables additional layers of functionality to  
357 modulate function in addition to direct interactions.

358 In summary, we report the biochemical and structural analysis of tanapoxvirus 16L,  
359 which revealed a broad high affinity binding profile for mammalian pro-apoptotic Bcl-2  
360 proteins. Furthermore, our crystal structures of TPV16L bound to Bax and Puma BH3  
361 indicate that TPV16L displays substantial structural plasticity, being able to adopt both a  
362 classical monomeric Bcl-2 fold as well as a domain-swapped dimeric Bcl-2 fold. Overall, our

363 findings provide a mechanistic platform for dissecting the role of 16L for tanapoxvirus  
364 replication and infectivity.

365

### 366 **Competing interests**

367 The authors declare no competing financial interests in relation to the work described.

368

### 369 **Author Contributions**

370 Chathura D. Suraweera: Acquisition, analysis and interpretation of data; Drafting and  
371 revising the article.

372 Mohd Ishtiaq Anasir: Acquisition, analysis and interpretation of data.

373 Airah Javorsky: Acquisition, analysis and interpretation of data;

374 Srishti Chugh: Acquisition, analysis and interpretation of data.

375 Rachael E. Impey: Acquisition, analysis and interpretation of data.

376 Muhammad Hasan Zadeh: Acquisition, analysis and interpretation of data.

377 Tatiana P. Soares da Costa: Acquisition, analysis and interpretation of data; Drafting and  
378 revising the article.

379 Mark G. Hinds: Conception and design; Analysis and interpretation of data; Drafting and  
380 revising the article;

381 Marc Kvensakul: Conception and design; Acquisition of data; Analysis and interpretation of  
382 data; Drafting and revising the article.

383

### 384 **Acknowledgements**

385 We thank staff at the MX beamlines at the Australian Synchrotron for help with X-ray data  
386 collection. We thank the ACRF for their support of the Eiger MX detector at the Australian

387 Synchrotron MX2 beamline and the Comprehensive Proteomics Platform at La Trobe



388 University for core instrument support. This research was funded by the Australian Research  
389 Council (Fellowship FT130101349 to MK and DE190100806 to TPSC), National Health and  
390 Medical Research Council of Australia (CDA fellowship 637372 and Project Grant  
391 APP1007918 to MK). and La Trobe University (Scholarship to CDS, MIA, AJ and REI).

392 **Tables**

393 **Table 1:** Interactions of TPV16L with pro-apoptotic BH3 motif peptides. All affinities were  
394 measured using isothermal titration calorimetry and  $K_D$  values given in nM as a mean of  
395 three independent experiments with SD.

396

| <b>Peptide</b> | <b>WT</b>  | <b>R90A</b>  | <b>A96I</b> | <b>K52A</b>  |
|----------------|------------|--------------|-------------|--------------|
| Bak            | 38 ± 4     | 2325 ± 261   | 1534 ± 67   | 113 ± 3      |
| Bax            | 70 ± 5     | 2301 ± 374   | 691 ± 92    | 266 ± 11     |
| Bok            | NB         | NB           | NB          | NB           |
| Bad            | 132 ± 35   | 10206 ± 1570 | 4721 ± 320  | 5857 ± 732   |
| Bid            | 719 ± 66   | 12675 ± 1257 | 1720 ± 152  | 976 ± 126    |
| Bik            | 1250 ± 111 | 14356 ± 1370 | 3178 ± 300  | 3382 ± 85    |
| Bim            | 196 ± 12   | 1766 ± 320   | 1824 ± 220  | 575 ± 36     |
| Bmf            | 606 ± 76   | 4894 ± 644   | 1927 ± 487  | 13520 ± 3810 |
| Hrk            | 3550 ± 770 | 5378 ± 315   | 6279 ± 793  | 10081 ± 2710 |
| Noxa           | NB         | NB           | NB          | NB           |
| Puma           | 468 ± 47   | 941 ± 54     | 817 ± 31    | 1010 ± 130   |

397

398

399 **Table 2:** X-ray data collection and refinement statistics. Values in parentheses are for the

|                                        | TPV16L:Bax BH3                   | TPV16L:Puma BH3                               | TPV16L:Puma BH3                |
|----------------------------------------|----------------------------------|-----------------------------------------------|--------------------------------|
| <b>Data collection</b>                 |                                  |                                               |                                |
| Space group                            | P4 <sub>3</sub> 2 <sub>1</sub> 2 | P2 <sub>1</sub> 2 <sub>1</sub> 2 <sub>1</sub> | P3 <sub>2</sub> 2 <sub>1</sub> |
| Cell dimensions                        |                                  |                                               |                                |
| a, b, c (Å)                            | 55.38, 55.38, 126.94             | 54.09, 54.87, 60.22                           | 59.65, 59.65, 90.90            |
| α, β, γ (°)                            | 90 90 90                         | 90, 90, 90                                    | 90, 90, 120                    |
| Wavelength (Å)                         | 0.9537                           | 0.9537                                        | 0.9537                         |
| Resolution (Å)                         | 33.33-2.12 (2.19-2.12)           | 32.45-1.85 (1.91-1.85)                        | 44.92-3.00 (3.11-3.00)         |
| R <sub>sym</sub> or R <sub>merge</sub> | 0.097 (2.67)                     | 0.066 (1.55)                                  | 0.168(1.50)                    |
| I / σI                                 | 11.2 (0.8)                       | 11.1 (0.9)                                    | 4.3 (0.7)                      |
| Completeness (%)                       | 99.86 (99.65)                    | 99.51 (97.62)                                 | 99.9 (100)                     |
| CC <sub>1/2</sub>                      | 0.99 (0.29)                      | 0.99 (0.40)                                   | 0.99 (0.34)                    |
| Redundancy                             | 8.6 (6.6)                        | 5.5 (4.7)                                     | 4.7 (4.6)                      |
| <b>Refinement</b>                      |                                  |                                               |                                |
| No. reflections                        | 11838                            | 15799                                         | 7992                           |
| R <sub>work</sub> / R <sub>free</sub>  | 0.239/254                        | 0.195/0.223                                   | 0.242/0.276                    |
| Clashscore                             | 0                                | 2.17                                          | 2.66                           |
| No. atoms                              |                                  |                                               |                                |
| Protein                                | 1291                             | 1369                                          | 1298                           |
| Ligand/ion                             | 2                                | 1                                             | 1                              |
| Water                                  | 23                               | 91                                            | 8                              |
| B-factors                              |                                  |                                               |                                |
| Protein                                | 65.68                            | 51.74                                         | 72.84                          |
| Ligand/ion                             | 84.20                            | 86.29                                         | 63.59                          |
| Water                                  | 60.76                            | 50.89                                         | 65.12                          |
| R.m.s. deviations                      |                                  |                                               |                                |
| Bond lengths (Å)                       | 0.003                            | 0.006                                         | 0.003                          |
| Bond angles (°)                        | 0.44                             | 0.67                                          | 0.51                           |

400 highest resolution shell.

401

402

403

404 **Figure legends**

405 **Figure 1:** Sequence alignment of TPV16L with pro-survival Bcl-2 family members. The  
406 sequences of tanapoxvirus 16L (uniprot accession number: A7XCC0), deerpoxvirus DPV022  
407 (uniprot accession number: Q08FX8), vaccinia virus F1L (uniprot accession number:  
408 O57173), myxomavirus M11L (uniprot accession number: Q85295) and human Bcl-x<sub>L</sub>  
409 (uniprot accession number: Q07817) were aligned using MUSCLE [50]. Secondary structure  
410 elements are marked based on the crystal structure of TPV16L, and BH motifs are boxed and  
411 shown in bold [68]. The regions of helix are marked ‘H’ and unstructured loops with a bar  
412 above the sequence, conserved residues are denoted by ‘\*’, with highly conservative  
413 substitutions indicated by ‘:’ and conserved substitutions indicated by ‘.’.

414

415 **Figure 2:** TPV16L engages a broad spectrum of BH3 motif peptides of pro-apoptotic Bcl-2  
416 proteins. The affinities of recombinant TPV16L for BH3 motif peptides (26-mers, except for  
417 a Bid 34-mer and Bax 28-mers) were measured using ITC and the raw thermograms shown.  
418 K<sub>D</sub> values (in nM) are the means of 3 experiments ± SD NB: no binding detected. The  
419 binding affinities are tabulated in Table 1.

420

421 **Figure 3:** TPV16L is able to prevent Bak and Bax induced yeast growth arrest. Yeast co-  
422 transformed with constructs encoding Bax or Bak and the indicated pro-survival proteins,  
423 each under the control of an inducible (GAL) promoter, were spotted onto inducing galactose  
424 (“ON”) or repressing glucose (“OFF”) plates as 5-fold serial dilutions. Images are  
425 representative of 2 independent experiments.

426

427 **Figure 4:** Crystal structures of TPV16L bound to Bax, Puma and Bim BH3 motifs.

428 (a) TPV16L (slate) in complex with the Bax BH3 domain (yellow). TPV16L helices are

429 labelled  $\alpha$ 1-7. The left-hand view is of the hydrophobic binding groove of one protomer  
430 formed by helices  $\alpha$ 3-5, the right-hand view is the domain swapped dimer viewed along the  
431 2-fold symmetry axis between the domain-swapped  $\alpha$ 1 helices. **(b)** TPV16L (slate) in  
432 complex with the Bim BH3 domain (dark green) **(c)** DPV022 (cyan) in complex with the Bax  
433 BH3 domain (yellow) [29]. The view is as in (a). **(d)** TPV16L (slate) in complex with the  
434 Puma BH3 domain (olive) **(e)** Myxoma virus M11L (green) in complex with Bak BH3  
435 (magenta). All structures were aligned using DALI pairwise alignment [53] and the view is as  
436 in (a). The view in the right-hand panels in (b) and (c) are as in (a).

437

438 **Figure 5:** Detailed view of the TPV16L: Bax, Bim and Puma BH3 interfaces and mutation  
439 sites. **a)** Surface depiction of the TPV16L: Bax BH3 complex. The TPV16L surface,  
440 backbone and floor of the binding groove are shown in grey and pink respectively, while Bax  
441 BH3 is shown as a yellow ribbon. The four key hydrophobic residues of Bax BH3 (L157,  
442 L161, I164 and I68L) are protruding into the binding groove, and the conserved salt-bridge  
443 formed by Bax D166 and TPV16L R90 are labeled, as well as residues involved in hydrogen  
444 bonds. **b)** TPV16L:Bim BH3 with the surface of TPV16L is shown as in (a), and Bim BH3  
445 is shown in dark green. The four key hydrophobic residues of Bim BH3 (I157, L161, I164  
446 and F168) are protruding into the binding groove, and the conserved salt-bridge formed by  
447 Bim D166 and TPV16L R90 are labeled, as well as residues involved in hydrogen bonds.  
448 Interactions are denoted as black dotted lines. **c)** TPV16L:Puma BH3 is shown as in (a), with  
449 Puma BH3 shown in olive. The four key hydrophobic residues of Puma BH3 (I136, L140,  
450 M143 and L147) are protruding into the binding groove, and the conserved salt-bridge  
451 formed by Puma D145 and TPV16L R90 are labeled, as well as residues involved in  
452 hydrogen bonds. Interactions are denoted as black dotted lines. **d)** TPV16L is shown as a  
453 grey surface, with locations of mutations used to investigate the binding site shaded in red.

454 The views were selected for the clearest view of the groove interactions in each case.

455

456 **Figure 6:** Sedimentation velocity analytical ultracentrifugation analysis of **a,b**) TPV16L on  
457 its own at initial concentrations of 0.2 mg/ml (black), 0.4 mg/ml (orange) and 0.8 mg/ml  
458 (purple) and **c,d**) TPV16L at an initial concentration of 0.2 mg/ml unliganded (black) and in  
459 complex with Bim (blue), Bax (green) or Puma (red). *Top panels* – Residuals resulting from  
460 the sedimentation coefficient distribution  $c(s)$  (**a,c**) and distribution of molar masses  $c(M)$   
461 (**b,d**) best fits are plotted as a function of radial position. The residuals for the given curves  
462 are shown in the same colour above the plots. M denotes monomeric, D dimeric and T  
463 tetrameric species.

464

#### 465 **Supplementary figure legends**

466

467 **Figure S1:** 2Fo-Fc electron density maps of **(a)** TPV16L:Bax BH3 complex interface. **(b)**  
468 TPV16L:Puma BH3 complex interface. **(c)** TPV16L:Bim BH3 complex interface. All maps  
469 were contoured at  $1.5 \sigma$ . The N- and C-termini of the BH3 peptides are labelled and the  
470 structures aligned as in Figure 4. The view was selected for observational clarity of the BH3  
471 peptide side chains.

472

473 **Figure S2:** Superimposition of TPV16L complexes with other closely related Bcl-2 proteins.  
474 **(a)** Superimposition of the C $\alpha$  backbone of TPV16L:Bax BH3 (slate and yellow) with  
475 DPV022:Bax BH3 (cyan and yellow, PDB ID 4UF2). **(b)** TPV16L:Bax BH3 (slate and  
476 yellow) with DPV022:Bak BH3 (cyan and magenta, PDB ID 4UF1) **(c)** TPV16L:Puma BH3  
477 (slate and green) (green) with human Mcl-1:Puma BH3 (raspberry and green, PDB ID  
478 6QFM), the most similar structure to that of TPV16L:Puma BH3 identified using Dali. All

479 views are into the canonical ligand binding groove formed by helices  $\alpha$ 2-5. Superimpositions  
480 were generated using pairwise Dali alignment [53].

481

482 **Figure S3:** Cartoon diagrams of dimeric topologies in the Bcl-2 family **(a)** Vaccinia virus  
483 N1L homodimer (cyan, PDB ID 2UXE) [59]. **(b)** Grouper iridovirus GIV66 (green, PDB ID  
484 5VMN) [21]. **(c)** Human Bcl-w (sand, PDB ID 2Y6W) [64]. **(d)** Human Bcl-x<sub>L</sub> (red, PDB ID  
485 1R2D) [60]. **(e)** Human Bak core-latch dimer (magenta, PDB ID 4U2U) [65]. **(f)** Human Bax  
486 core-latch dimer (blue, PDB ID 4ZIE) [66]. **(g)** Catfish Bax groove-tail dimer (yellow and  
487 orange, PDB ID 5W63) [67].

488

489 **References:**

- 490 1. Downie, A. W., Taylor-Robinson, C. H., Caunt, A. E., Nelson, G. S., Manson-Bahr, P. E.  
491 & Matthews, T. C. (1971) Tanapox: a new disease caused by a pox virus, *Br Med J.* **1**, 363-8.
- 492 2. Knight, J. C., Novembre, F. J., Brown, D. R., Goldsmith, C. S. & Esposito, J. J. (1989)  
493 Studies on Tanapox virus, *Virology.* **172**, 116-24.
- 494 3. Brunetti, C. R., Paulose-Murphy, M., Singh, R., Qin, J., Barrett, J. W., Tardivel, A.,  
495 Schneider, P., Essani, K. & McFadden, G. (2003) A secreted high-affinity inhibitor of human  
496 TNF from Tanapox virus, *Proc Natl Acad Sci U S A.* **100**, 4831-6.
- 497 4. Nazarian, S. H., Barrett, J. W., Frace, A. M., Olsen-Rasmussen, M., Khristova, M.,  
498 Shaban, M., Neering, S., Li, Y., Damon, I. K., Esposito, J. J., Essani, K. & McFadden, G.  
499 (2007) Comparative genetic analysis of genomic DNA sequences of two human isolates of  
500 Tanapox virus, *Virus Res.* **129**, 11-25.
- 501 5. Kvensakul, M. & Hinds, M. G. (2015) The Bcl-2 family: structures, interactions and  
502 targets for drug discovery, *Apoptosis.* **20**, 136-50.
- 503 6. Banjara, S. S., C.D.; Hinds, M.G.; Kvensakul, M. (2020) The Bcl-2 Family: Ancient  
504 Origins, Conserved Structures, and Divergent Mechanisms., *Biomolecules.* **10**, 128.
- 505 7. Kvensakul, M. & Hinds, M. G. (2013) Structural biology of the Bcl-2 family and its  
506 mimicry by viral proteins, *Cell Death Dis.* **4**, e909.
- 507 8. Kvensakul, M. & Hinds, M. G. (2014) The structural biology of BH3-only proteins,  
508 *Methods Enzymol.* **544**, 49-74.
- 509 9. Shamas-Din, A., Kale, J., Leber, B. & Andrews, D. W. (2013) Mechanisms of action of  
510 bcl-2 family proteins, *Cold Spring Harb Perspect Biol.* **5**, a008714.
- 511 10. McArthur, K., Whitehead, L. W., Heddleston, J. M., Li, L., Padman, B. S., Oorschot, V.,  
512 Geoghegan, N. D., Chappaz, S., Davidson, S., San Chin, H., Lane, R. M., Dramicanin, M.,  
513 Saunders, T. L., Sugiana, C., Lessene, R., Osellame, L. D., Chew, T. L., Dewson, G.,  
514 Lazarou, M., Ramm, G., Lessene, G., Ryan, M. T., Rogers, K. L., van Delft, M. F. & Kile, B.  
515 T. (2018) BAK/BAX macropores facilitate mitochondrial herniation and mtDNA efflux  
516 during apoptosis, *Science.* **359**.
- 517 11. Tait, S. W. & Green, D. R. (2010) Mitochondria and cell death: outer membrane  
518 permeabilization and beyond, *Nat Rev Mol Cell Biol.* **11**, 621-32.
- 519 12. Kvensakul, M., Caria, S. & Hinds, M. G. (2017) The Bcl-2 Family in Host-Virus  
520 Interactions, *Viruses.* **9**, 290.
- 521 13. Kvensakul, M., Wei, A. H., Fletcher, J. I., Willis, S. N., Chen, L., Roberts, A. W.,  
522 Huang, D. C. & Colman, P. M. (2010) Structural basis for apoptosis inhibition by Epstein-  
523 Barr virus BHRF1, *PLoS Pathog.* **6**, e1001236.
- 524 14. Henderson, S., Huen, D., Rowe, M., Dawson, C., Johnson, G. & Rickinson, A. (1993)  
525 Epstein-Barr virus-coded BHRF1 protein, a viral homologue of Bcl-2, protects human B cells  
526 from programmed cell death, *Proc Natl Acad Sci U S A.* **90**, 8479-83.
- 527 15. Huang, Q., Petros, A. M., Virgin, H. W., Fesik, S. W. & Olejniczak, E. T. (2002)  
528 Solution structure of a Bcl-2 homolog from Kaposi sarcoma virus, *Proc Natl Acad Sci U S A.*  
529 **99**, 3428-33.
- 530 16. Sarid, R., Sato, T., Bohenzky, R. A., Russo, J. J. & Chang, Y. (1997) Kaposi's sarcoma-  
531 associated herpesvirus encodes a functional bcl-2 homologue, *Nat Med.* **3**, 293-8.
- 532 17. Cheng, E. H., Nicholas, J., Bellows, D. S., Hayward, G. S., Guo, H. G., Reitz, M. S. &  
533 Hardwick, J. M. (1997) A Bcl-2 homolog encoded by Kaposi sarcoma-associated virus,  
534 human herpesvirus 8, inhibits apoptosis but does not heterodimerize with Bax or Bak, *Proc*  
535 *Natl Acad Sci U S A.* **94**, 690-4.
- 536 18. Banjara, S., Caria, S., Dixon, L. K., Hinds, M. G. & Kvensakul, M. (2017) Structural  
537 Insight into African Swine Fever Virus A179L-Mediated Inhibition of Apoptosis, *J Virol.* **91**,  
538 e02228-16.



- 539 19. Brun, A., Rivas, C., Esteban, M., Escribano, J. M. & Alonso, C. (1996) African swine  
540 fever virus gene A179L, a viral homologue of bcl-2, protects cells from programmed cell  
541 death, *Virology*. **225**, 227-30.
- 542 20. Banjara, S., Shimmon, G. L., Dixon, L. K., Netherton, C. L., Hinds, M. G. & Kvensakul,  
543 M. (2019) Crystal Structure of African Swine Fever Virus A179L with the Autophagy  
544 Regulator Beclin, *Viruses*. **11**, 789.
- 545 21. Banjara, S., Mao, J., Ryan, T. M., Caria, S. & Kvensakul, M. (2018) Grouper iridovirus  
546 GIV66 is a Bcl-2 protein that inhibits apoptosis by exclusively sequestering Bim, *J Biol*  
547 *Chem*. **293**, 5464-5477.
- 548 22. Lin, P. W., Huang, Y. J., John, J. A., Chang, Y. N., Yuan, C. H., Chen, W. Y., Yeh, C.  
549 H., Shen, S. T., Lin, F. P., Tsui, W. H. & Chang, C. Y. (2008) Iridovirus Bcl-2 protein  
550 inhibits apoptosis in the early stage of viral infection, *Apoptosis*. **13**, 165-76.
- 551 23. Campbell, S., Thibault, J., Mehta, N., Colman, P. M., Barry, M. & Kvensakul, M. (2014)  
552 Structural insight into BH3 domain binding of vaccinia virus antiapoptotic F1L, *J Virol*. **88**,  
553 8667-77.
- 554 24. Marshall, B., Puthalakath, H., Caria, S., Chugh, S., Doerflinger, M., Colman, P. M. &  
555 Kvensakul, M. (2015) Variola virus F1L is a Bcl-2-like protein that unlike its vaccinia virus  
556 counterpart inhibits apoptosis independent of Bim, *Cell Death Dis*. **6**, e1680.
- 557 25. Wasilenko, S. T., Stewart, T. L., Meyers, A. F. & Barry, M. (2003) Vaccinia virus  
558 encodes a previously uncharacterized mitochondrial-associated inhibitor of apoptosis, *Proc*  
559 *Natl Acad Sci U S A*. **100**, 14345-50.
- 560 26. Opgenorth, A., Graham, K., Nation, N., Strayer, D. & McFadden, G. (1992) Deletion  
561 analysis of two tandemly arranged virulence genes in myxoma virus, M11L and myxoma  
562 growth factor, *J Virol*. **66**, 4720-31.
- 563 27. Douglas, A. E., Corbett, K. D., Berger, J. M., McFadden, G. & Handel, T. M. (2007)  
564 Structure of M11L: A myxoma virus structural homolog of the apoptosis inhibitor, Bcl-2,  
565 *Protein Sci*. **16**, 695-703.
- 566 28. Kvensakul, M., van Delft, M. F., Lee, E. F., Gulbis, J. M., Fairlie, W. D., Huang, D. C. &  
567 Colman, P. M. (2007) A structural viral mimic of prosurvival Bcl-2: a pivotal role for  
568 sequestering proapoptotic Bax and Bak, *Mol Cell*. **25**, 933-42.
- 569 29. Burton, D. R., Caria, S., Marshall, B., Barry, M. & Kvensakul, M. (2015) Structural basis  
570 of Deerpox virus-mediated inhibition of apoptosis, *Acta Crystallogr D Biol Crystallogr*. **71**,  
571 1593-603.
- 572 30. Anasir, M. I., Baxter, A. A., Poon, I. K. H., Hulett, M. D. & Kvensakul, M. (2017)  
573 Structural and Functional Insight into Canarypox Virus CNP058 Mediated Regulation of  
574 Apoptosis, *Viruses*. **9**, 305.
- 575 31. Anasir, M. I., Caria, S., Skinner, M. A. & Kvensakul, M. (2017) Structural basis of  
576 apoptosis inhibition by the fowlpox virus protein FPV039, *J Biol Chem*. **292**, 9010-9021.
- 577 32. Kvensakul, M., Yang, H., Fairlie, W. D., Czabotar, P. E., Fischer, S. F., Perugini, M. A.,  
578 Huang, D. C. & Colman, P. M. (2008) Vaccinia virus anti-apoptotic F1L is a novel Bcl-2-like  
579 domain-swapped dimer that binds a highly selective subset of BH3-containing death ligands,  
580 *Cell Death Differ*. **15**, 1564-71.
- 581 33. Okamoto, T., Campbell, S., Mehta, N., Thibault, J., Colman, P. M., Barry, M., Huang, D.  
582 C. & Kvensakul, M. (2012) Sheeppox virus SPPV14 encodes a Bcl-2-like cell death inhibitor  
583 that counters a distinct set of mammalian proapoptotic proteins, *J Virol*. **86**, 11501-11.
- 584 34. Soares da Costa, T. P., Yap, M. Y., Perugini, M. A., Wallace, J. C., Abell, A. D., Wilce,  
585 M. C., Polyak, S. W. & Booker, G. W. (2014) Dual roles of F123 in protein  
586 homodimerization and inhibitor binding to biotin protein ligase from *Staphylococcus aureus*,  
587 *Mol Microbiol*. **91**, 110-20.

- 588 35. Soares da Costa, T. P., Patel, M., Desbois, S., Gupta, R., Faou, P. & Perugini, M. A.  
589 (2017) Identification of a dimeric KDG aldolase from *Agrobacterium tumefaciens*, *Proteins*.  
590 **85**, 2058-2065.
- 591 36. Soares da Costa, T. P., Desbois, S., Dogovski, C., Gorman, M. A., Ketaren, N. E.,  
592 Paxman, J. J., Siddiqui, T., Zammit, L. M., Abbott, B. M., Robins-Browne, R. M., Parker, M.  
593 W., Jameson, G. B., Hall, N. E., Panjikar, S. & Perugini, M. A. (2016) Structural  
594 Determinants Defining the Allosteric Inhibition of an Essential Antibiotic Target, *Structure*.  
595 **24**, 1282-1291.
- 596 37. Soares da Costa, T. P., Christensen, J. B., Desbois, S., Gordon, S. E., Gupta, R., Hogan,  
597 C. J., Nelson, T. G., Downton, M. T., Gardhi, C. K., Abbott, B. M., Wagner, J., Panjikar, S.  
598 & Perugini, M. A. (2015) Quaternary Structure Analyses of an Essential Oligomeric Enzyme,  
599 *Methods Enzymol.* **562**, 205-23.
- 600 38. Laue, T. M. (1992) Computer-aided interpretation of analytical sedimentation data for  
601 proteins, *Analytical Ultracentrifugation in Biochemistry and Polymer Science*, 90-125.
- 602 39. Schuck, P., Perugini, M. A., Gonzales, N. R., Howlett, G. J. & Schubert, D. (2002) Size-  
603 distribution analysis of proteins by analytical ultracentrifugation: strategies and application to  
604 model systems, *Biophys J.* **82**, 1096-111.
- 605 40. Schuck, P. (2000) Size-distribution analysis of macromolecules by sedimentation  
606 velocity ultracentrifugation and lamm equation modeling, *Biophys J.* **78**, 1606-19.
- 607 41. Perugini, M. A., Schuck, P. & Howlett, G. J. (2002) Differences in the binding capacity  
608 of human apolipoprotein E3 and E4 to size-fractionated lipid emulsions, *Eur J Biochem.* **269**,  
609 5939-49.
- 610 42. Kvensakul, M. & Czabotar, P. E. (2016) Preparing Samples for Crystallization of Bcl-2  
611 Family Complexes, *Methods Mol Biol.* **1419**, 213-29.
- 612 43. Kabsch, W. (2010) Xds, *Acta Crystallogr D Biol Crystallogr.* **66**, 125-32.
- 613 44. Evans, P. (2006) Scaling and assessment of data quality, *Acta Crystallogr D Biol*  
614 *Crystallogr.* **62**, 72-82.
- 615 45. McCoy, A. J. (2007) Solving structures of protein complexes by molecular replacement  
616 with Phaser, *Acta Crystallogr D Biol Crystallogr.* **63**, 32-41.
- 617 46. Emsley, P., Lohkamp, B., Scott, W. G. & Cowtan, K. (2010) Features and development  
618 of Coot, *Acta Crystallogr D Biol Crystallogr.* **66**, 486-501.
- 619 47. Echols, N., Grosse-Kunstleve, R. W., Afonine, P. V., Bunkoczi, G., Chen, V. B., Headd,  
620 J. J., McCoy, A. J., Moriarty, N. W., Read, R. J., Richardson, D. C., Richardson, J. S.,  
621 Terwilliger, T. C. & Adams, P. D. (2012) Graphical tools for macromolecular  
622 crystallography in PHENIX, *J Appl Crystallogr.* **45**, 581-586.
- 623 48. Morin, A., Eisenbraun, B., Key, J., Sanschagrin, P. C., Timony, M. A., Ottaviano, M. &  
624 Sliz, P. (2013) Collaboration gets the most out of software, *Elife.* **2**, e01456.
- 625 49. Meyer, P. A., Socias, S., Key, J., Ransey, E., Tjon, E. C., Buschiazzo, A., Lei, M., Botka,  
626 C., Withrow, J., Neau, D., Rajashankar, K., Anderson, K. S., Baxter, R. H., Blacklow, S. C.,  
627 Boggon, T. J., Bonvin, A. M., Borek, D., Brett, T. J., Caflisch, A., Chang, C. I., Chazin, W.  
628 J., Corbett, K. D., Cosgrove, M. S., Crosson, S., Dhe-Paganon, S., Di Cera, E., Drennan, C.  
629 L., Eck, M. J., Eichman, B. F., Fan, Q. R., Ferre-D'Amare, A. R., Fromme, J. C., Garcia, K.  
630 C., Gaudet, R., Gong, P., Harrison, S. C., Heldwein, E. E., Jia, Z., Keenan, R. J., Kruse, A.  
631 C., Kvensakul, M., McLellan, J. S., Modis, Y., Nam, Y., Otwinowski, Z., Pai, E. F., Pereira,  
632 P. J., Petosa, C., Raman, C. S., Rapoport, T. A., Roll-Mecak, A., Rosen, M. K., Rudenko, G.,  
633 Schlessinger, J., Schwartz, T. U., Shamoo, Y., Sondermann, H., Tao, Y. J., Tolia, N. H.,  
634 Tsodikov, O. V., Westover, K. D., Wu, H., Foster, I., Fraser, J. S., Maia, F. R., Gonen, T.,  
635 Kirchhausen, T., Diederichs, K., Crosas, M. & Sliz, P. (2016) Data publication with the  
636 structural biology data grid supports live analysis, *Nat Commun.* **7**, 10882.

- 637 50. Edgar, R. C. (2004) MUSCLE: multiple sequence alignment with high accuracy and high  
638 throughput, *Nucleic Acids Res.* **32**, 1792-7.
- 639 51. Hawkins, C. J., Wang, S. L. & Hay, B. A. (1999) A cloning method to identify caspases  
640 and their regulators in yeast: identification of *Drosophila* IAP1 as an inhibitor of the  
641 *Drosophila* caspase DCP-1, *Proc Natl Acad Sci U S A.* **96**, 2885-90.
- 642 52. Jabbour, A. M., Puryer, M. A., Yu, J. Y., Lithgow, T., Riffkin, C. D., Ashley, D. M.,  
643 Vaux, D. L., Ekert, P. G. & Hawkins, C. J. (2006) Human Bcl-2 cannot directly inhibit the  
644 *Caenorhabditis elegans* Apaf-1 homologue CED-4, but can interact with EGL-1, *J Cell Sci.*  
645 **119**, 2572-82.
- 646 53. Holm, L. & Rosenstrom, P. (2010) Dali server: conservation mapping in 3D, *Nucleic*  
647 *Acids Res.* **38**, W545-9.
- 648 54. Pelz, N. F., Bian, Z., Zhao, B., Shaw, S., Tarr, J. C., Belmar, J., Gregg, C., Camper, D.  
649 V., Goodwin, C. M., Arnold, A. L., Sensintaffar, J. L., Friberg, A., Rossanese, O. W., Lee,  
650 T., Olejniczak, E. T. & Fesik, S. W. (2016) Discovery of 2-Indole-acylsulfonamide Myeloid  
651 Cell Leukemia 1 (Mcl-1) Inhibitors Using Fragment-Based Methods, *J Med Chem.* **59**, 2054-  
652 66.
- 653 55. Sattler, M., Liang, H., Nettessheim, D., Meadows, R. P., Harlan, J. E., Eberstadt, M.,  
654 Yoon, H. S., Shuker, S. B., Chang, B. S., Minn, A. J., Thompson, C. B. & Fesik, S. W.  
655 (1997) Structure of Bcl-xL-Bak peptide complex: recognition between regulators of  
656 apoptosis, *Science.* **275**, 983-6.
- 657 56. Neidel, S., Maluquer de Motes, C., Mansur, D. S., Strnadova, P., Smith, G. L. &  
658 Graham, S. C. (2015) Vaccinia virus protein A49 is an unexpected member of the B-cell  
659 Lymphoma (Bcl)-2 protein family, *J Biol Chem.* **290**, 5991-6002.
- 660 57. de Motes, C. M., Cooray, S., Ren, H., Almeida, G. M. F., McGourty, K., Bahar, M. W.,  
661 Stuart, D. I., Grimes, J. M., Graham, S. C. & Smith, G. L. (2011) Inhibition of Apoptosis and  
662 NF- $\kappa$ B Activation by Vaccinia Protein N1 Occur via Distinct Binding Surfaces and Make  
663 Different Contributions to Virulence, *PLoS Pathog.* **7**, e1002430.
- 664 58. Graham, S. C., Bahar, M. W., Cooray, S., Chen, R. A., Whalen, D. M., Abrescia, N. G.,  
665 Alderton, D., Owens, R. J., Stuart, D. I., Smith, G. L. & Grimes, J. M. (2008) Vaccinia virus  
666 proteins A52 and B14 Share a Bcl-2-like fold but have evolved to inhibit NF- $\kappa$ B rather  
667 than apoptosis, *PLoS Pathog.* **4**, e1000128.
- 668 59. Cooray, S., Bahar, M. W., Abrescia, N. G., McVey, C. E., Bartlett, N. W., Chen, R. A.,  
669 Stuart, D. I., Grimes, J. M. & Smith, G. L. (2007) Functional and structural studies of the  
670 vaccinia virus virulence factor N1 reveal a Bcl-2-like anti-apoptotic protein, *J Gen Virol.* **88**,  
671 1656-66.
- 672 60. O'Neill, J. W., Manion, M. K., Maguire, B. & Hockenbery, D. M. (2006) BCL-XL  
673 dimerization by three-dimensional domain swapping, *J Mol Biol.* **356**, 367-81.
- 674 61. Denisov, A. Y., Sprules, T., Fraser, J., Kozlov, G. & Gehring, K. (2007) Heat-induced  
675 dimerization of BCL-xL through alpha-helix swapping, *Biochemistry.* **46**, 734-40.
- 676 62. Oberstein, A., Jeffrey, P. D. & Shi, Y. (2007) Crystal structure of the Bcl-XL-Beclin 1  
677 peptide complex: Beclin 1 is a novel BH3-only protein, *J Biol Chem.* **282**, 13123-32.
- 678 63. Hinds, M. G., Lackmann, M., Skea, G. L., Harrison, P. J., Huang, D. C. & Day, C. L.  
679 (2003) The structure of Bcl-w reveals a role for the C-terminal residues in modulating  
680 biological activity, *EMBO J.* **22**, 1497-507.
- 681 64. Lee, E. F., Dewson, G., Smith, B. J., Evangelista, M., Pettikiriarachchi, A., Dogovski, C.,  
682 Perugini, M. A., Colman, P. M. & Fairlie, W. D. (2011) Crystal Structure of a BCL-W  
683 Domain-Swapped Dimer: Implications for the Function of BCL-2 Family Proteins, *Structure.*  
684 **19**, 1467-76.
- 685 65. Brouwer, J. M., Westphal, D., Dewson, G., Robin, A. Y., Uren, R. T., Bartolo, R.,  
686 Thompson, G. V., Colman, P. M., Kluck, R. M. & Czabotar, P. E. (2014) Bak core and latch

687 domains separate during activation, and freed core domains form symmetric homodimers,  
688 *Mol Cell.* **55**, 938-946.  
689 66. Czabotar, P. E., Westphal, D., Dewson, G., Ma, S., Hockings, C., Fairlie, W. D., Lee, E.  
690 F., Yao, S., Robin, A. Y., Smith, B. J., Huang, D. C., Kluck, R. M., Adams, J. M. & Colman,  
691 P. M. (2013) Bax crystal structures reveal how BH3 domains activate Bax and nucleate its  
692 oligomerization to induce apoptosis, *Cell.* **152**, 519-31.  
693 67. Robin, A. Y., Iyer, S., Birkinshaw, R. W., Sandow, J., Wardak, A., Luo, C. S., Shi, M.,  
694 Webb, A. I., Czabotar, P. E., Kluck, R. M. & Colman, P. M. (2018) Ensemble Properties of  
695 Bax Determine Its Function, *Structure.* **26**, 1346-1359 e5.  
696 68. Petros, A. M., Olejniczak, E. T. & Fesik, S. W. (2004) Structural biology of the Bcl-2  
697 family of proteins, *Biochim Biophys Acta.* **1644**, 83-94.  
698

Figure 1

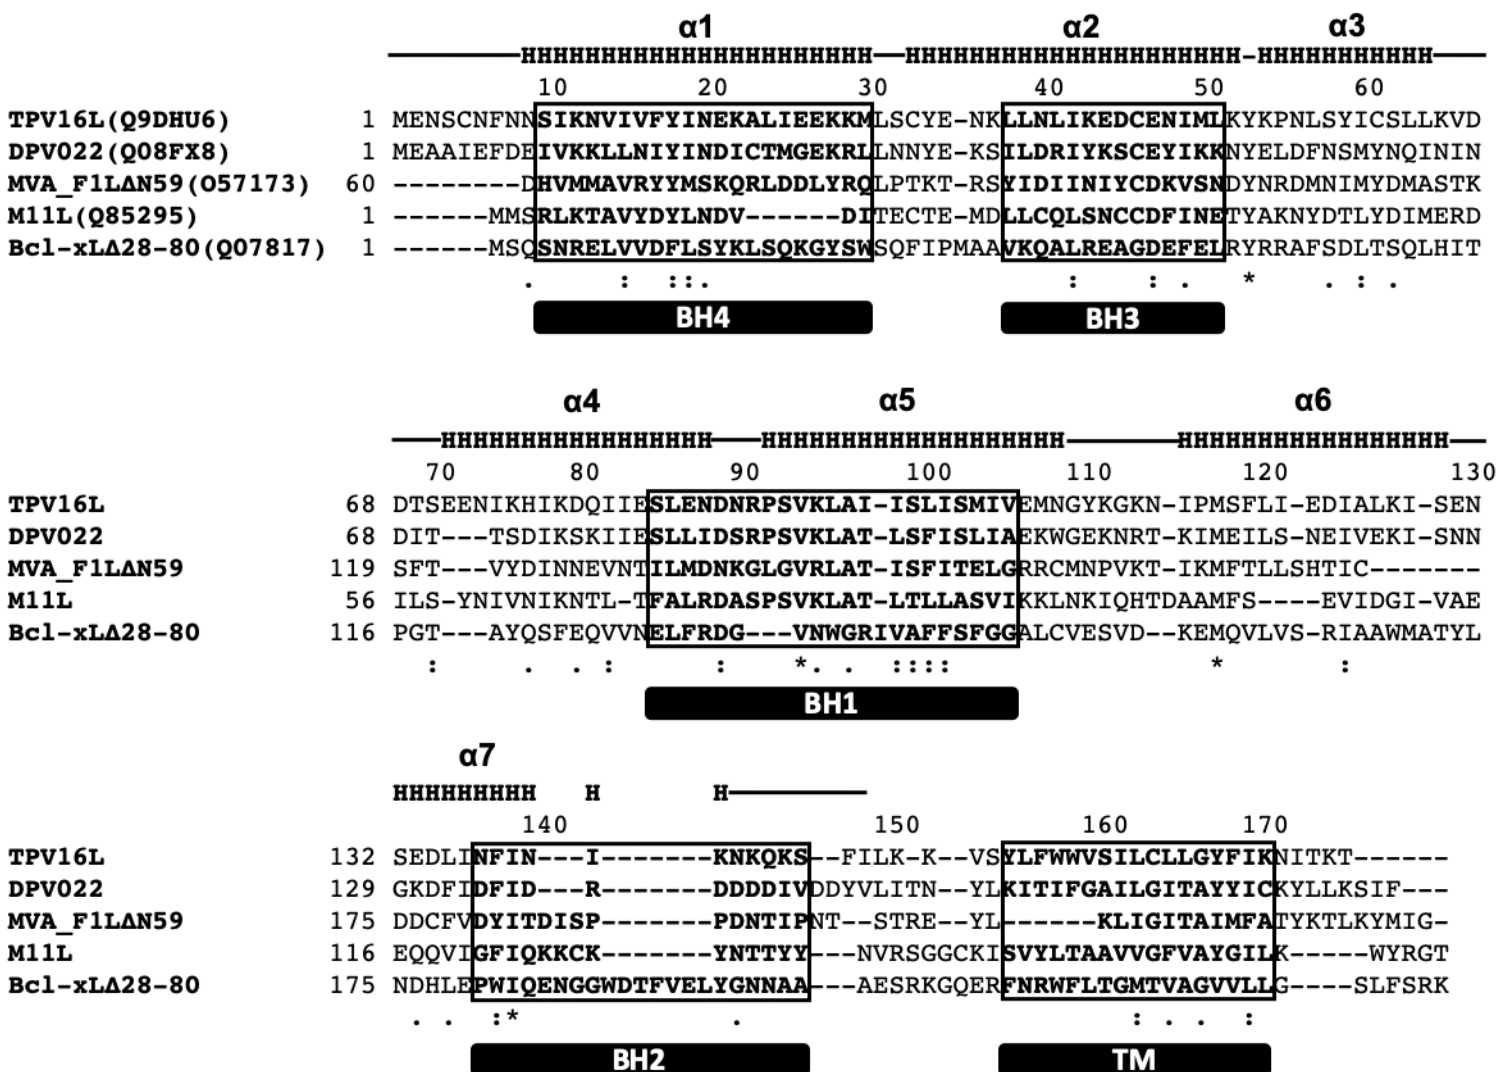

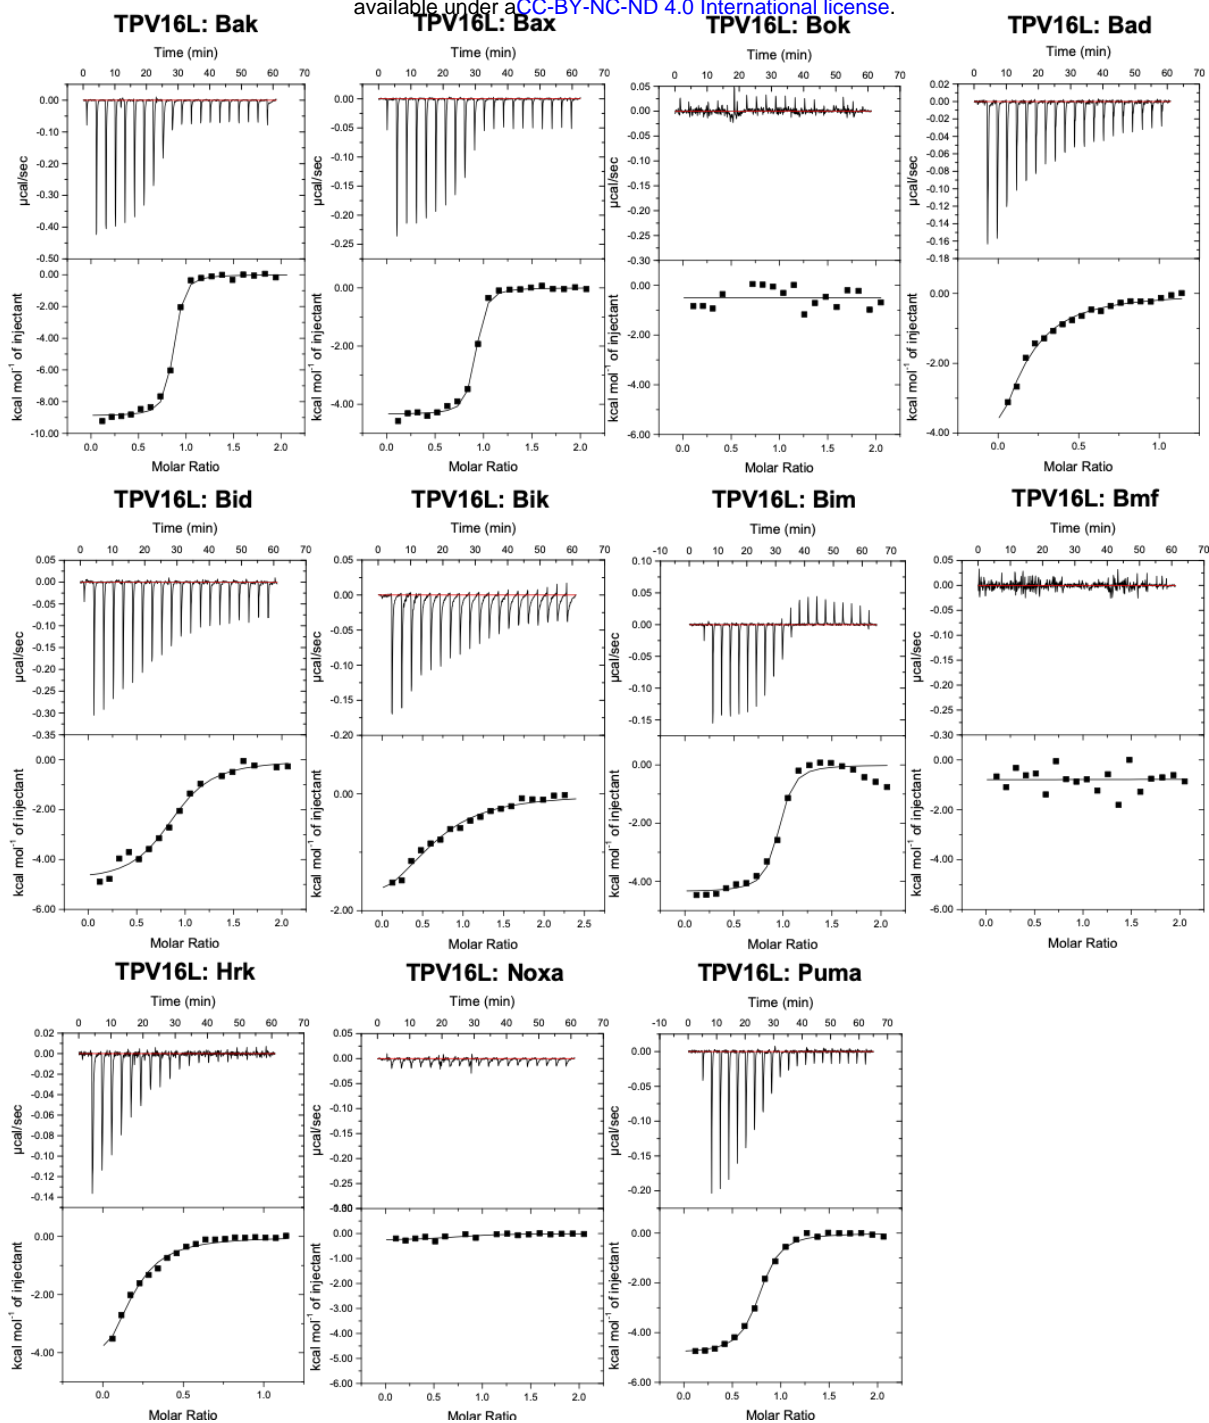

**Figure 3**

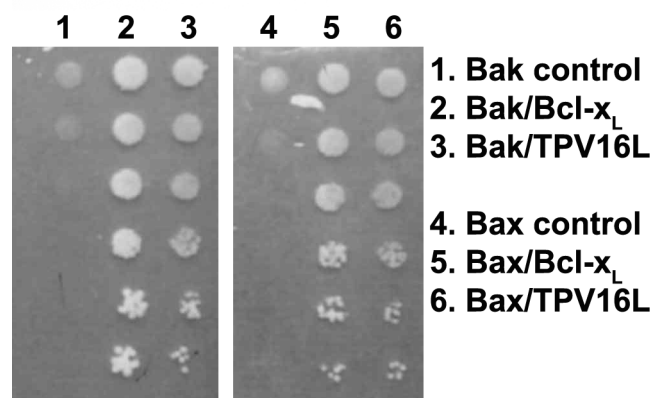

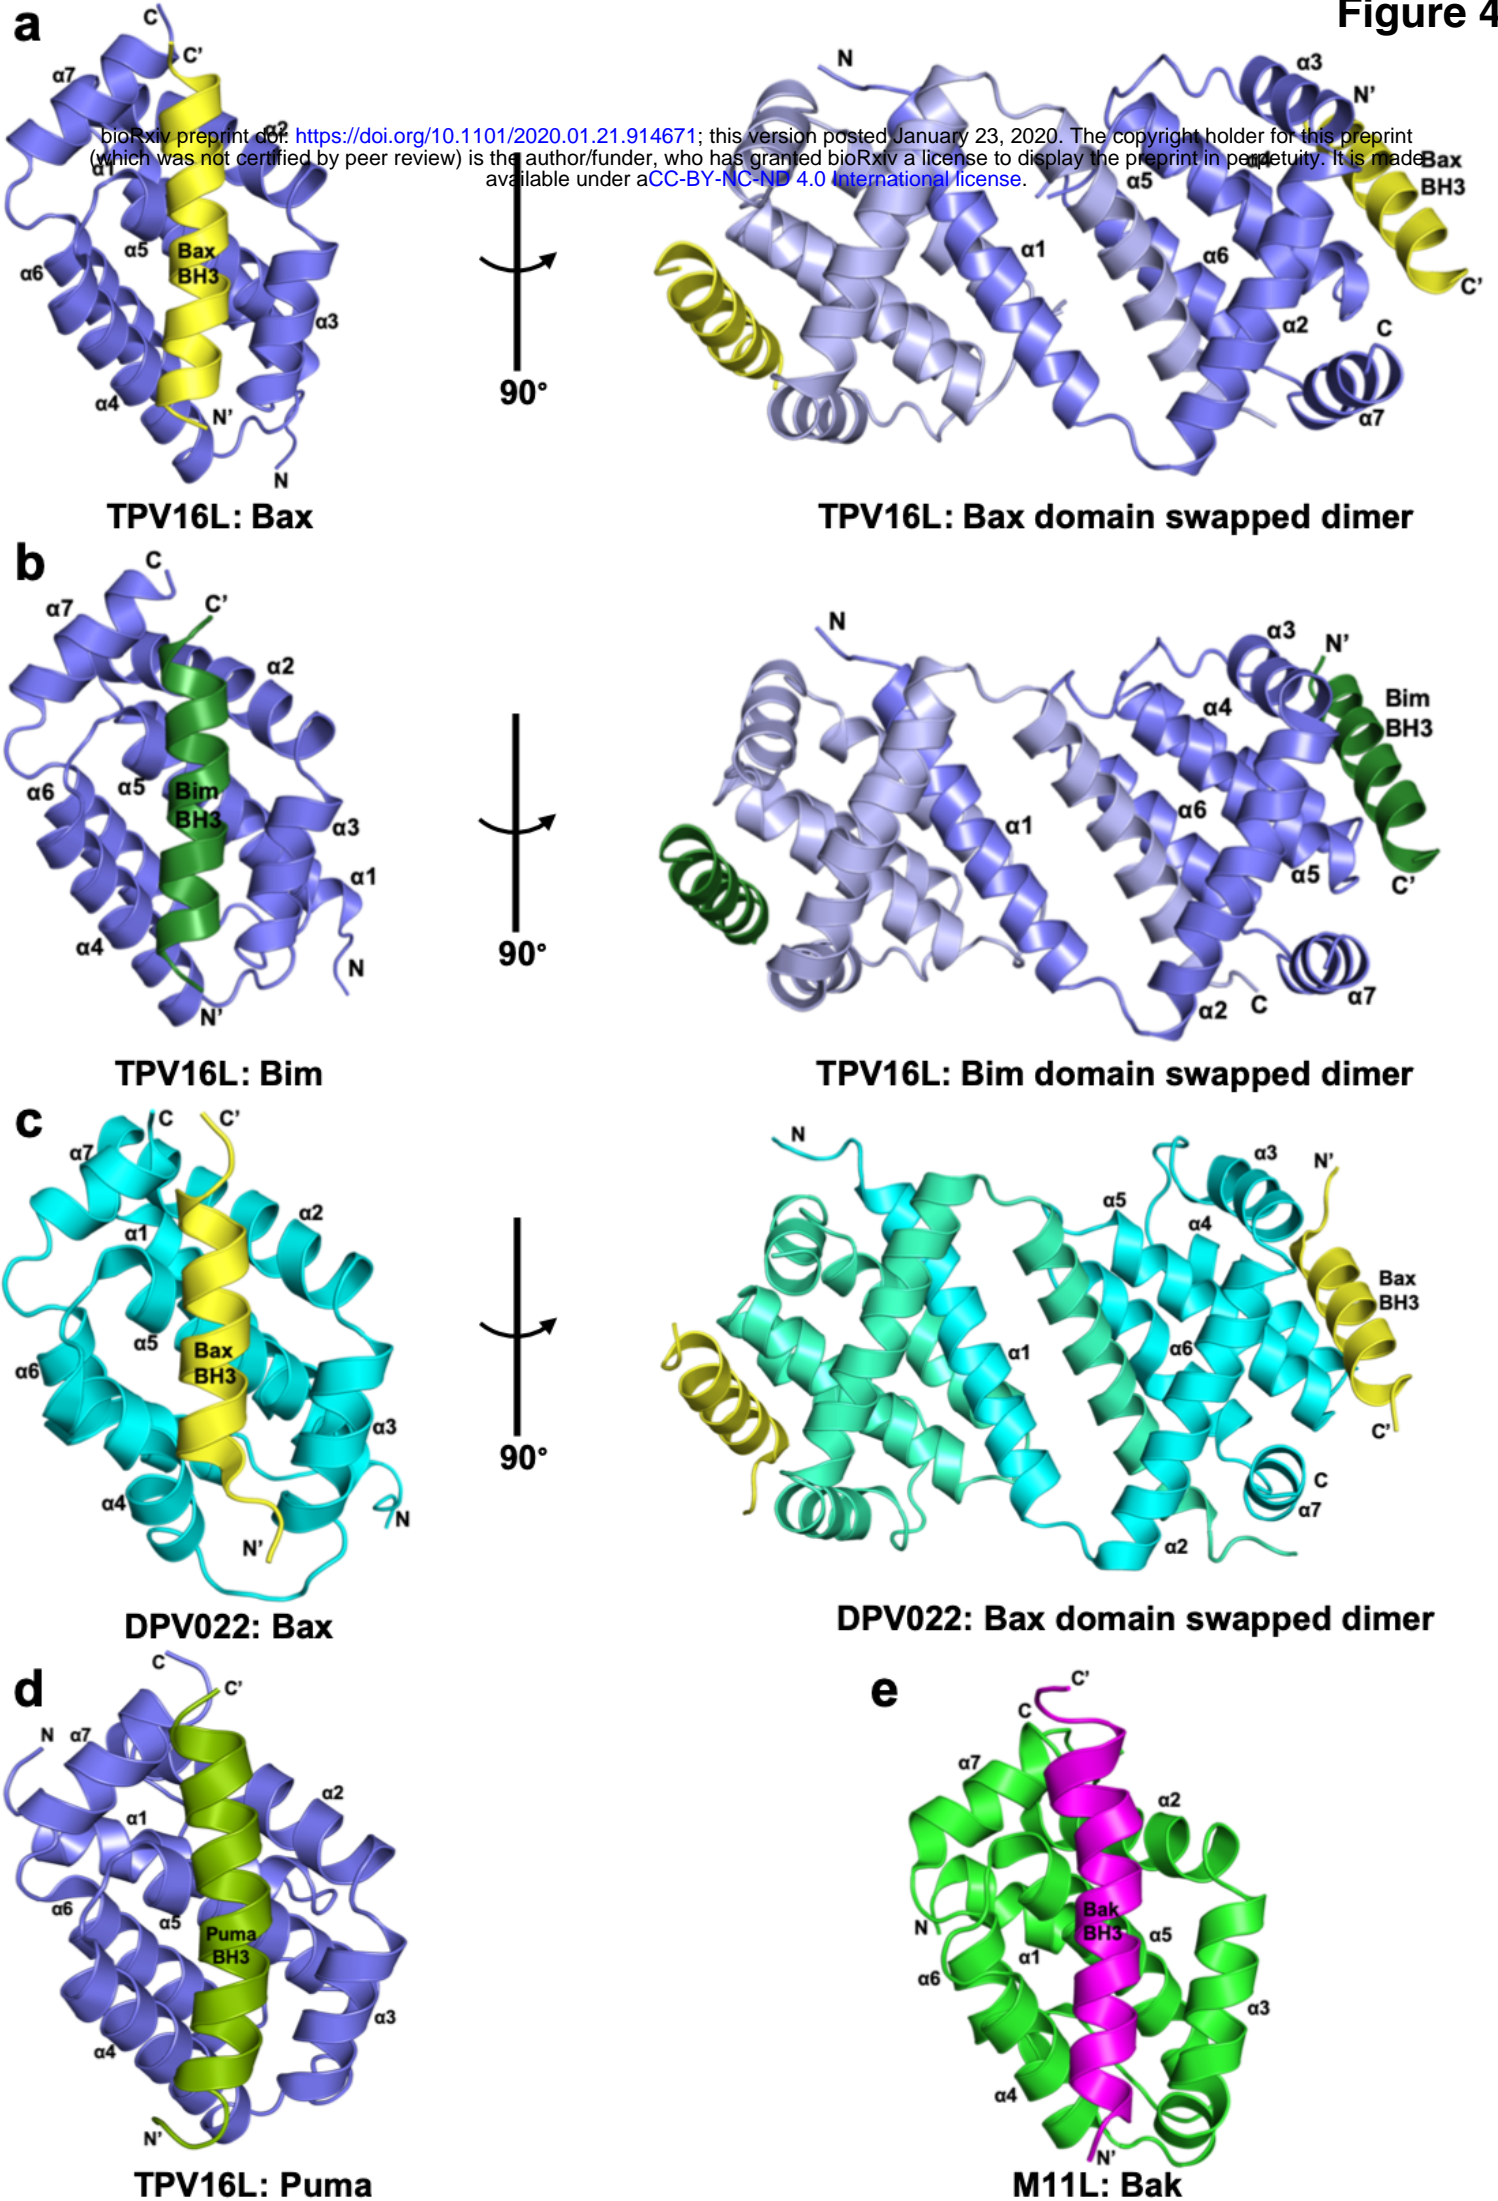



Figure 5

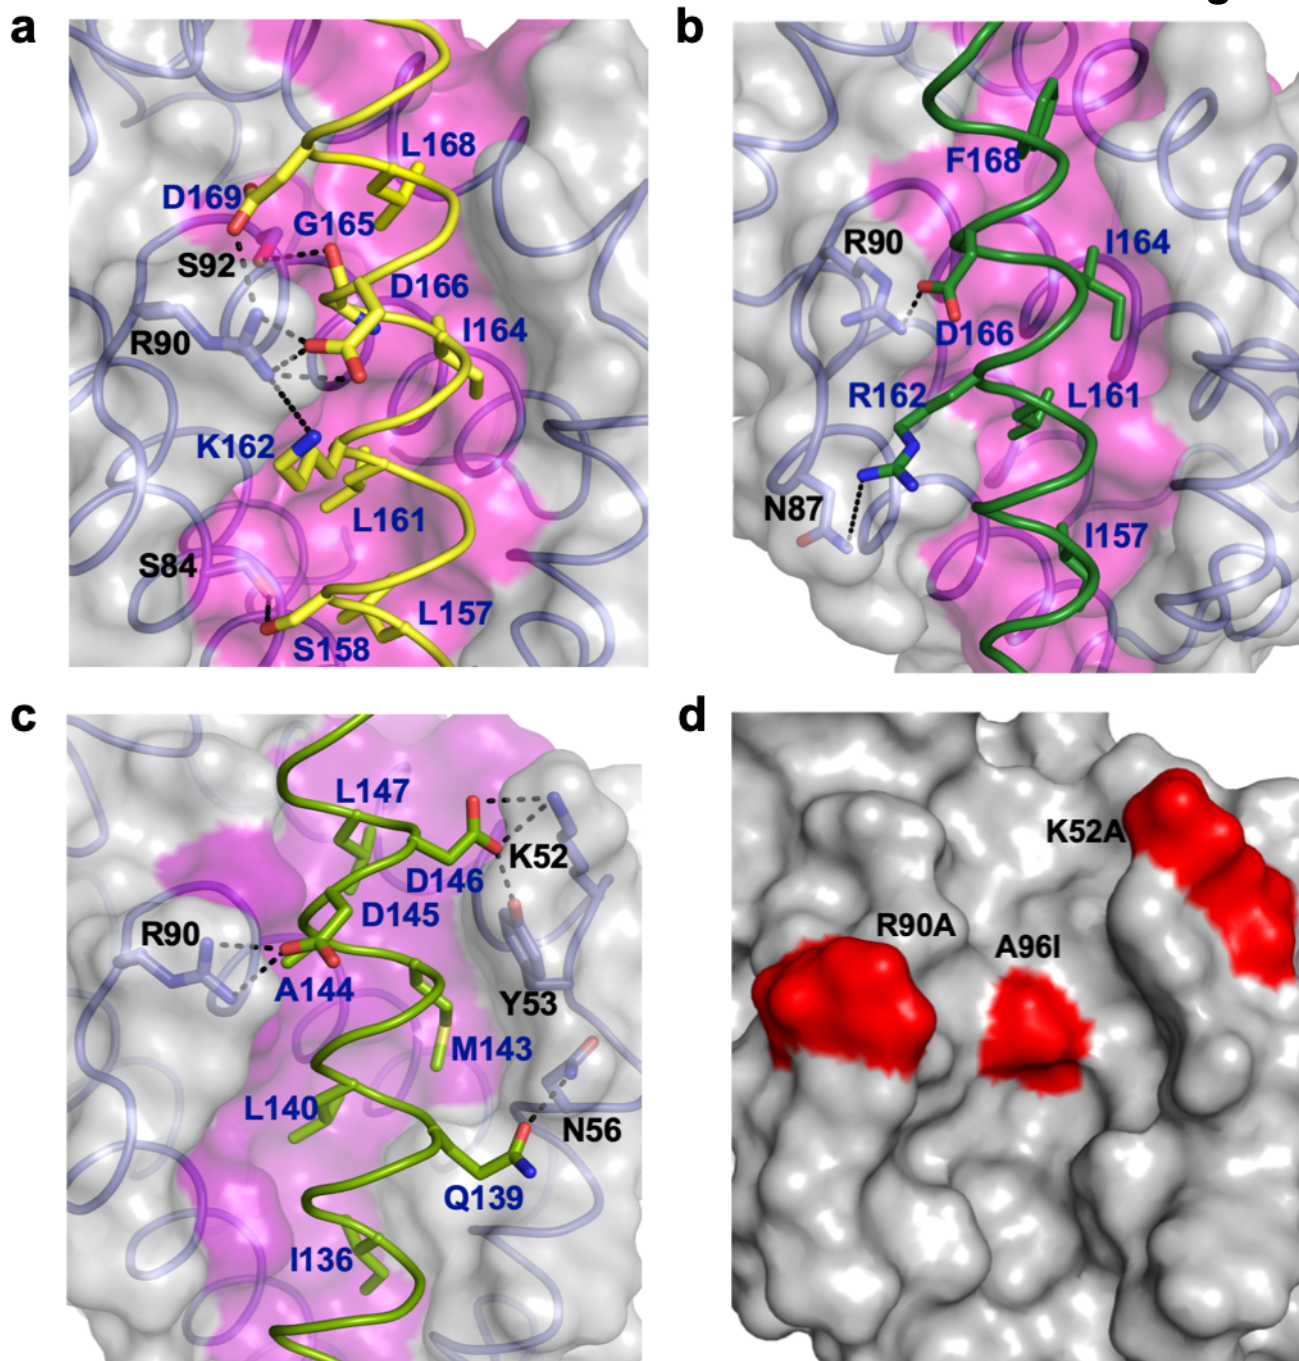

Figure 6

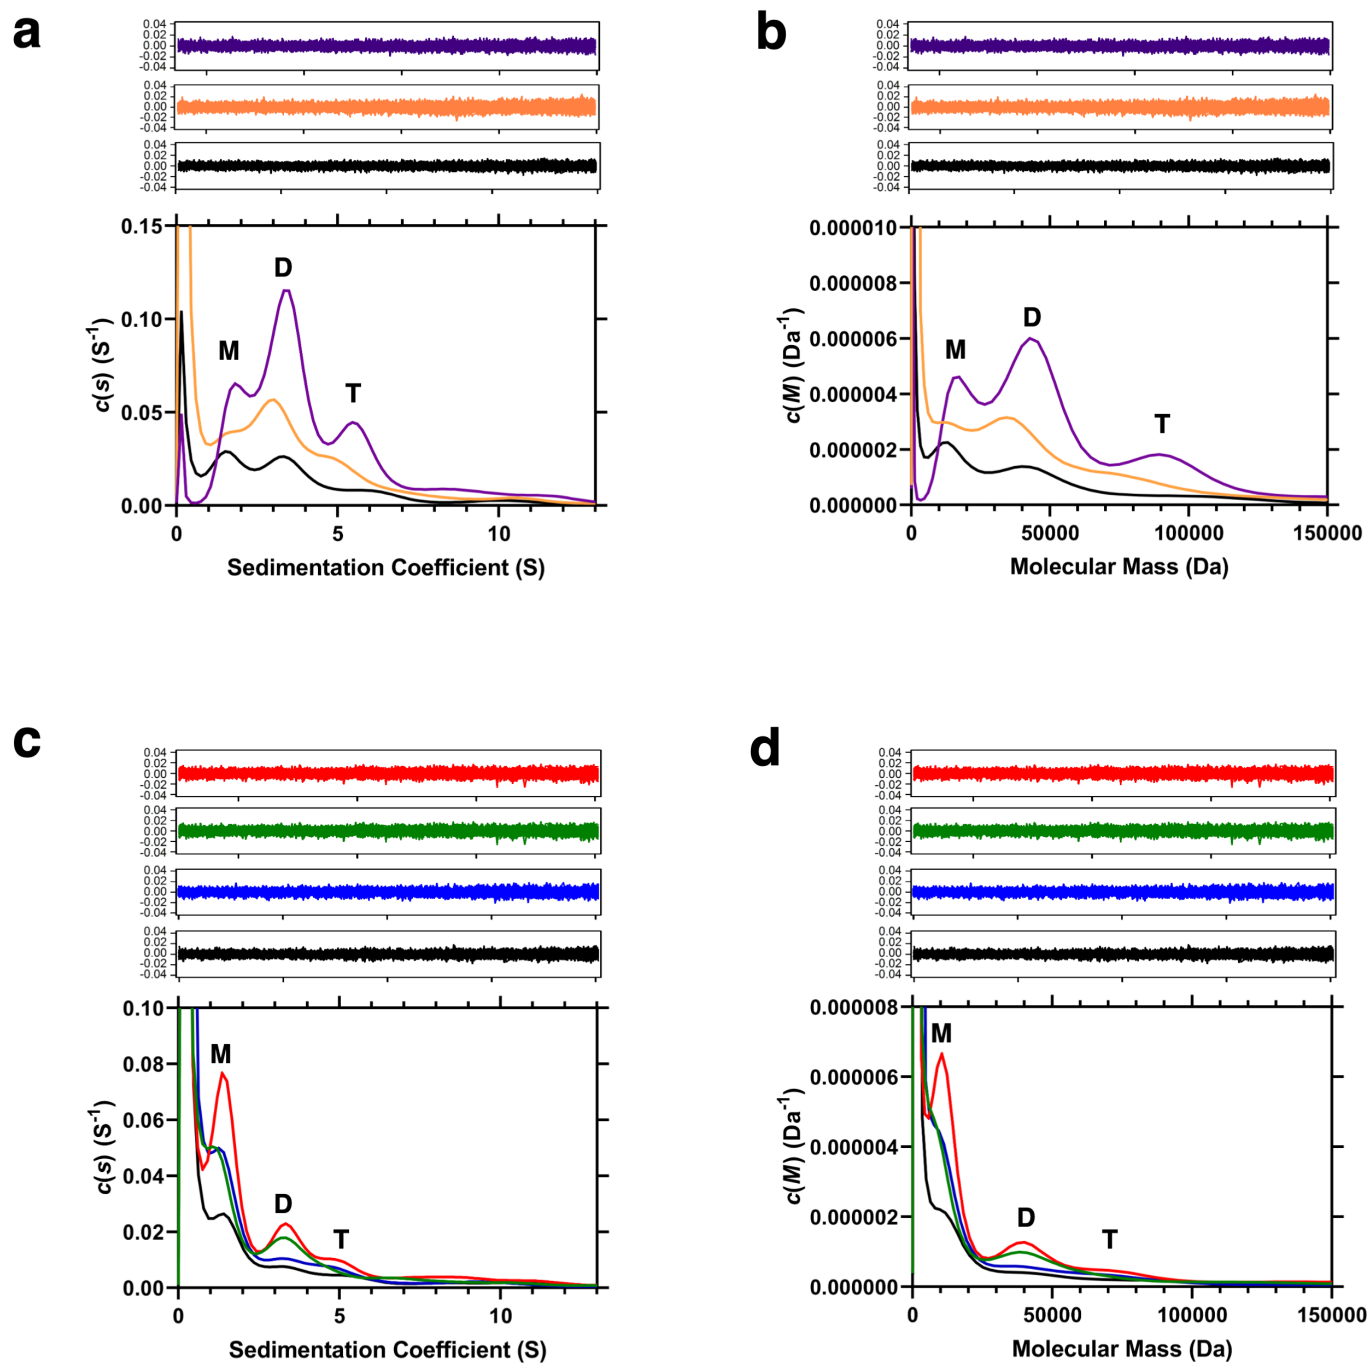

bioRxiv preprint doi: <https://doi.org/10.1101/2020.01.21.914671>; this version posted January 23, 2020. The copyright holder for this preprint (which was not certified by peer review) is the author/funder, who has granted bioRxiv a license to display the preprint in perpetuity. It is made available under aCC-BY-NC-ND 4.0 International license.

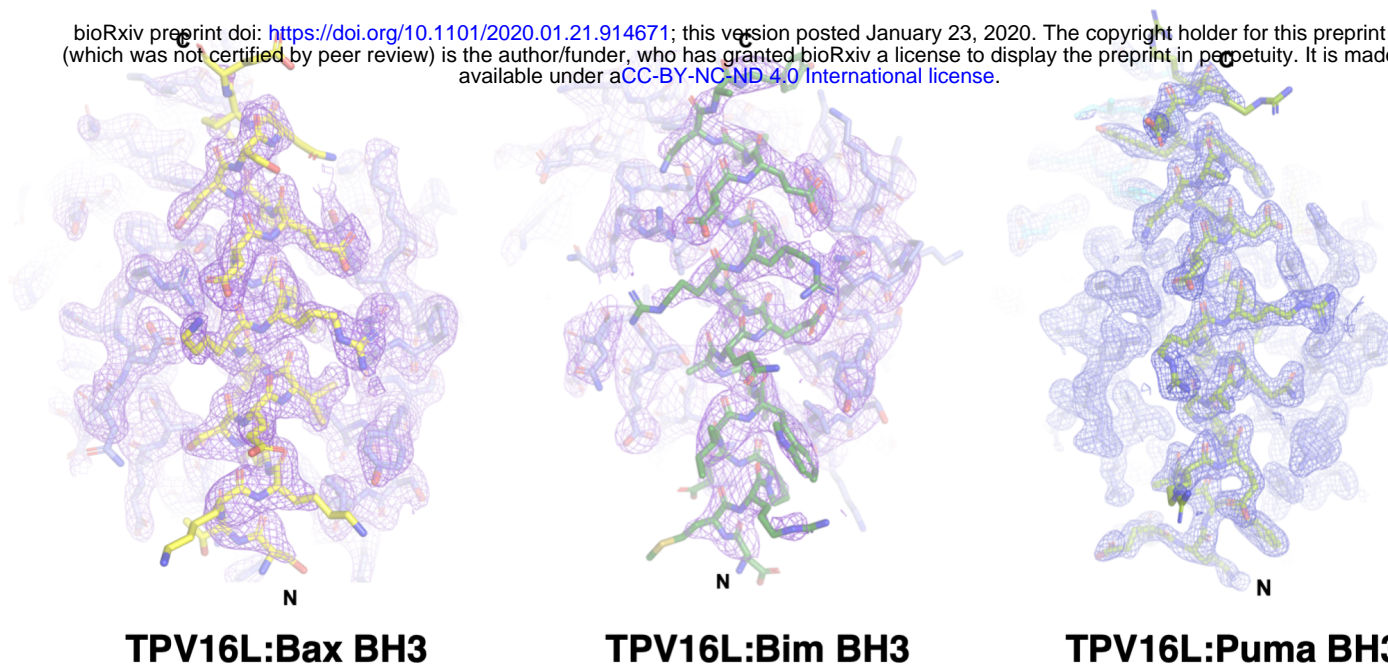

Figure S2

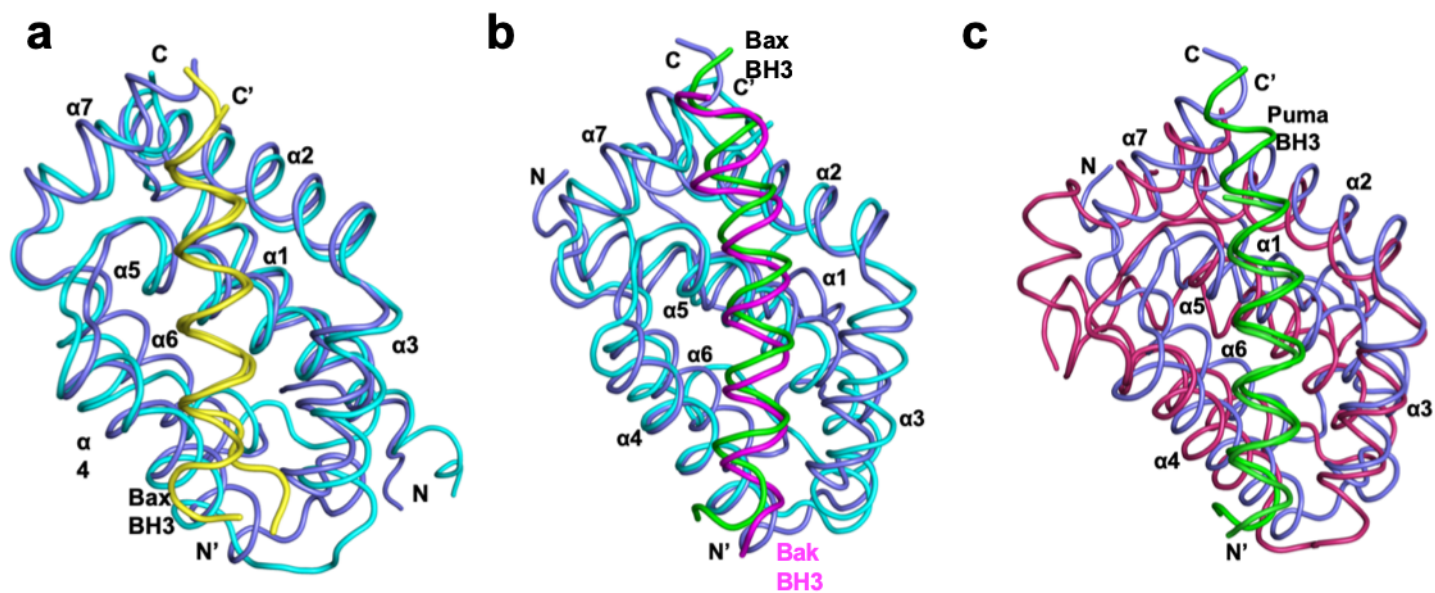

a

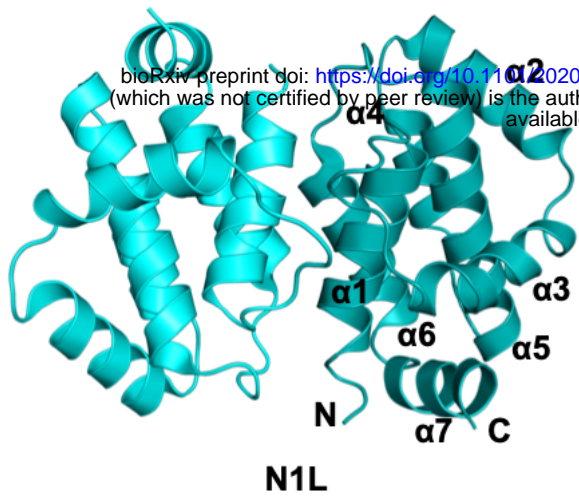

b

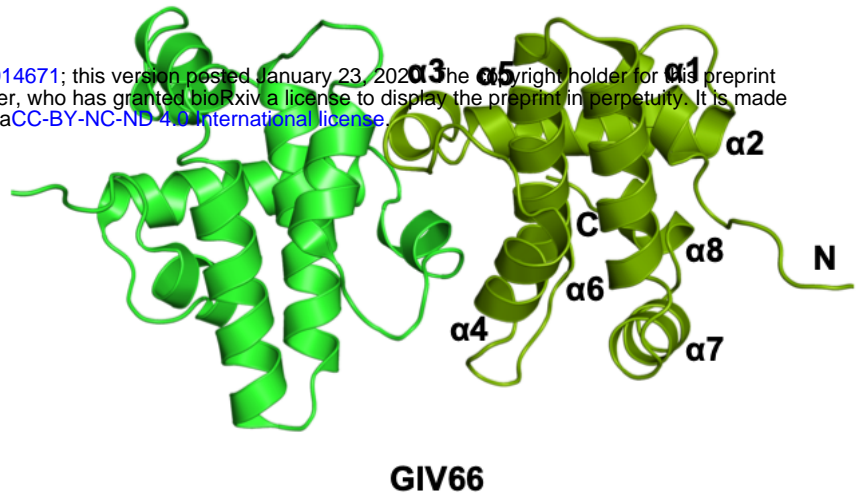

c

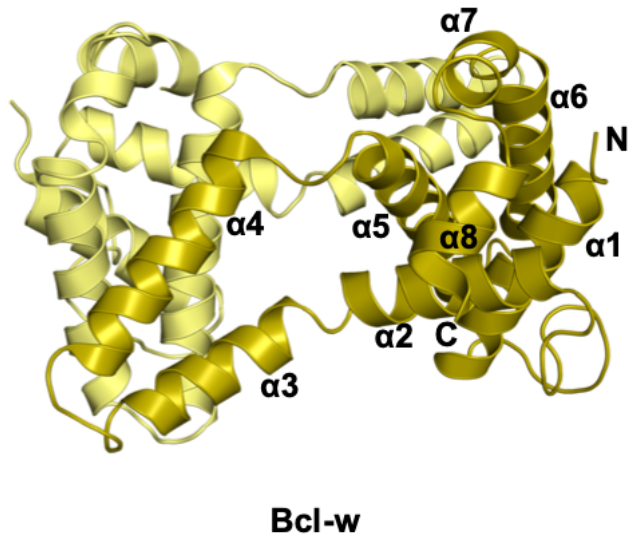

d

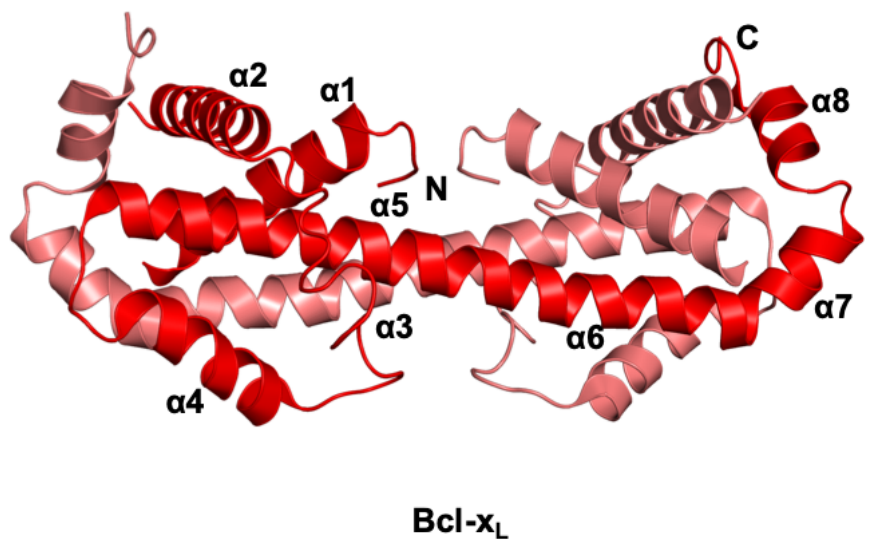

e

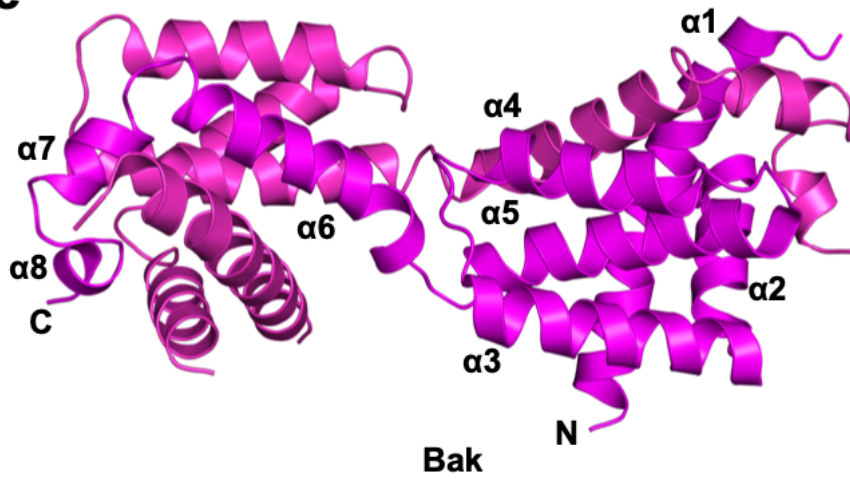

g

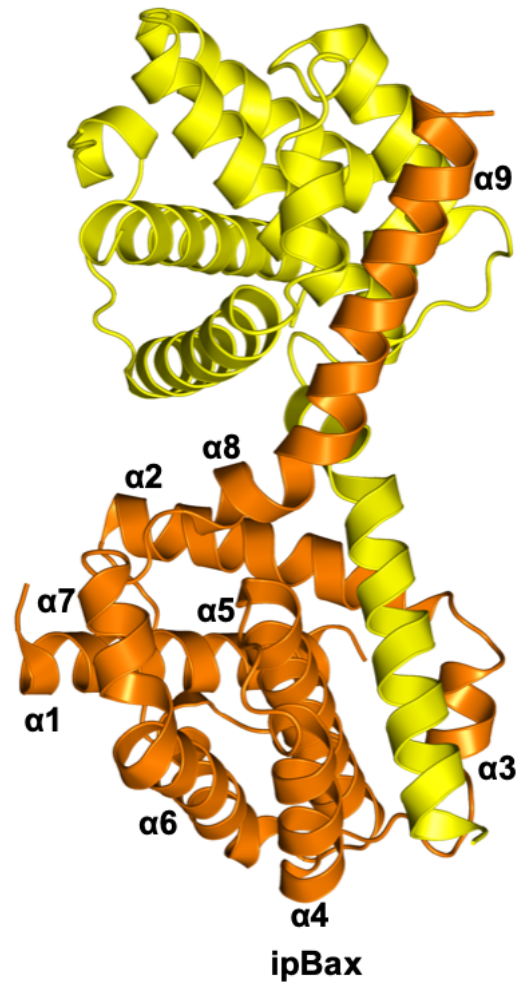

f

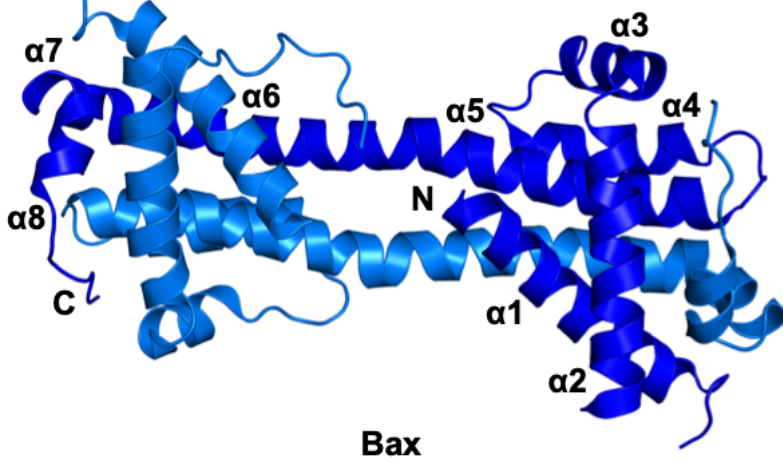

Source: https://www.biorxiv.org/content/10.1101/2020.01.21.914671v1.full.pdf
